# Supplementary material for: Assessing the Causal Association between Biological Aging Biomarkers and the Development of Cerebral Small Vessel Disease: A Mendelian Randomization Study
Source: MDPI journal article supplement (doi:10.3390/biology12050660), 2023-04-27
Supplement: s1 [file s1]

## SUPPLEMENTAL MATERIAL

### Catalog

|                                                                                                                        |    |
|------------------------------------------------------------------------------------------------------------------------|----|
| Supplement 1. GWAS datasets used in the present MR analysis.....                                                       | 3  |
| Supplement 2. The single SNP analysis and leave-one-out analysis for exposures on outcomes .....                       | 4  |
| Supplement 2 Figure 1. The single SNP analysis and leave-one-out analysis for LTL on WMH volume .....                  | 4  |
| Supplement 2 Figure 2. The single SNP analysis and leave-one-out analysis for LTL on FA .....                          | 5  |
| Supplement 2 Figure 3. The single SNP analysis and leave-one-out analysis for LTL on MD.....                           | 6  |
| Supplement 2 Figure 4. The single SNP analysis and leave-one-out analysis for LTL on lacunar stroke .....              | 7  |
| Supplement 2 Figure 5. The single SNP analysis and leave-one-out analysis for LTL on all location BMB.....             | 9  |
| Supplement 2 Figure 6. The single SNP analysis and leave-one-out analysis for LTL on lobar BMB .....                   | 9  |
| Supplement 2 Figure 7. The single SNP analysis and leave-one-out analysis for LTL on mixed or deep BMB .....           | 10 |
| Supplement 2 Figure 8. The single SNP analysis and leave-one-out analysis for LTL on all location ICH or SVS .....     | 11 |
| Supplement 2 Figure 9. The single SNP analysis and leave-one-out analysis for LTL on lobar ICH or SVS.....             | 12 |
| Supplement 2 Figure 10. The single SNP analysis and leave-one-out analysis for LTL on non-lobar ICH or SVS.....        | 13 |
| Supplement 2 Figure 11. The single SNP analysis and leave-one-out analysis for GrimAge on WMH volume.....              | 14 |
| Supplement 2 Figure 12. The single SNP analysis and leave-one-out analysis for GrimAge on FA.....                      | 15 |
| Supplement 2 Figure 13. The single SNP analysis and leave-one-out analysis for GrimAge on MD .....                     | 16 |
| Supplement 2 Figure 14. The single SNP analysis and leave-one-out analysis for GrimAge on lacunar stroke .....         | 17 |
| Supplement 2 Figure 15. The single SNP analysis and leave-one-out analysis for GrimAge on all location BMB .....       | 18 |
| Supplement 2 Figure 16. The single SNP analysis and leave-one-out analysis for GrimAge on lobar BMB.....               | 19 |
| Supplement 2 Figure 17. The single SNP analysis and leave-one-out analysis for GrimAge on mixed or deep BMB .....      | 20 |
| Supplement 2 Figure 18. The single SNP analysis and leave-one-out analysis for GrimAge on all location ICH or SVS..... | 21 |
| Supplement 2 Figure 19. The single SNP analysis and leave-one-out analysis for GrimAge on lobar ICH or SVS .....       | 22 |
| Supplement 2 Figure 20. The single SNP analysis and leave-one-out analysis for                                         |    |

|                                                                                                                                      |    |
|--------------------------------------------------------------------------------------------------------------------------------------|----|
| GrimAge on non-lobar ICH or SVS .....                                                                                                | 23 |
| Supplement 2 Figure 21. The single SNP analysis and leave-one-out analysis for PhenoAge on WMH volume .....                          | 24 |
| Supplement 2 Figure 22. The single SNP analysis and leave-one-out analysis for PhenoAge on FA .....                                  | 25 |
| Supplement 2 Figure 23. The single SNP analysis and leave-one-out analysis for PhenoAge on MD.....                                   | 26 |
| Supplement 2 Figure 24. The single SNP analysis and leave-one-out analysis for PhenoAge on lacunar stroke.....                       | 27 |
| Supplement 2 Figure 25. The single SNP analysis and leave-one-out analysis for PhenoAge on all location BMB.....                     | 28 |
| Supplement 2 Figure 26. The single SNP analysis and leave-one-out analysis for PhenoAge on lobar BMB .....                           | 29 |
| Supplement 2 Figure 27. The single SNP analysis and leave-one-out analysis for PhenoAge on mixed or deep BMB.....                    | 30 |
| Supplement 2 Figure 28. The single SNP analysis and leave-one-out analysis for PhenoAge on all location ICH or SVS .....             | 31 |
| Supplement 2 Figure 29. The single SNP analysis and leave-one-out analysis for PhenoAge on lobar ICH or SVS.....                     | 32 |
| Supplement 2 Figure 30. The single SNP analysis and leave-one-out analysis for PhenoAge on non-lobar ICH or SVS.....                 | 33 |
| Supplement 2 Figure 31. The single SNP analysis and leave-one-out analysis for HannumAge on WMH volume.....                          | 34 |
| Supplement 2 Figure 32. The single SNP analysis and leave-one-out analysis for HannumAge on FA .....                                 | 35 |
| Supplement 2 Figure 33. The single SNP analysis and leave-one-out analysis for HannumAge on MD .....                                 | 36 |
| Supplement 2 Figure 34. The single SNP analysis and leave-one-out analysis for HannumAge on lacunar stroke .....                     | 37 |
| Supplement 2 Figure 35. The single SNP analysis and leave-one-out analysis for HannumAge on all location BMB .....                   | 38 |
| Supplement 2 Figure 36. The single SNP analysis and leave-one-out analysis for HannumAge on lobar BMB.....                           | 39 |
| Supplement 2 Figure 37. The single SNP analysis and leave-one-out analysis for HannumAge on mixed or deep BMB .....                  | 40 |
| Supplement 2 Figure 38. The single SNP analysis and leave-one-out analysis for HannumAge on all location ICH or SVS.....             | 41 |
| Supplement 2 Figure 39. The single SNP analysis and leave-one-out analysis for HannumAge on lobar ICH or SVS .....                   | 42 |
| Supplement 2 Figure 40. The single SNP analysis and leave-one-out analysis for HannumAge on non-lobar ICH or SVS .....               | 43 |
| Supplement 2 Figure 41. The single SNP analysis and leave-one-out analysis for Intrinsic HorvathAge acceleration on WMH volume ..... | 44 |
| Supplement 2 Figure 42. The single SNP analysis and leave-one-out analysis for                                                       |    |

|                                                                                                                                                   |    |
|---------------------------------------------------------------------------------------------------------------------------------------------------|----|
| Intrinsic HorvathAge acceleration on FA .....                                                                                                     | 45 |
| Supplement 2 Figure 43. The single SNP analysis and leave-one-out analysis for Intrinsic HorvathAge acceleration on MD.....                       | 47 |
| Supplement 2 Figure 44. The single SNP analysis and leave-one-out analysis for Intrinsic HorvathAge acceleration on lacunar stroke.....           | 48 |
| Supplement 2 Figure 45. The single SNP analysis and leave-one-out analysis for Intrinsic HorvathAge acceleration on all location BMB.....         | 48 |
| Supplement 2 Figure 46. The single SNP analysis and leave-one-out analysis for Intrinsic HorvathAge acceleration on lobar BMB .....               | 49 |
| Supplement 2 Figure 47. The single SNP analysis and leave-one-out analysis for Intrinsic HorvathAge acceleration on mixed or deep BMB.....        | 50 |
| Supplement 2 Figure 48. The single SNP analysis and leave-one-out analysis for Intrinsic HorvathAge acceleration on all location ICH or SVS ..... | 51 |
| Supplement 2 Figure 49. The single SNP analysis and leave-one-out analysis for Intrinsic HorvathAge acceleration on lobar ICH or SVS.....         | 52 |
| Supplement 2 Figure 50. The single SNP analysis and leave-one-out analysis for Intrinsic HorvathAge acceleration on non-lobar ICH or SVS.....     | 53 |
| Supplement 3. Results of other four MR methods for causal effect of exposures on outcomes .....                                                   | 54 |
| Supplement 3 Table 1. Results of other four MR methods for causal effect of LTL on CSVD.....                                                      | 54 |
| Supplement 3 Table 2. Results of other four MR methods for causal effect of GrimAge on CSVD .....                                                 | 56 |
| Supplement 3 Table 3. Results of other four MR methods for causal effect of PhenoAge on CSVD.....                                                 | 57 |
| Supplement 3 Table 4. Results of other four MR methods for causal effect of HannumAge on CSVD.....                                                | 58 |
| Supplement 3 Table 5. Results of other four MR methods for causal effect of Intrinsic HorvathAge acceleration on CSVD.....                        | 59 |
| Supplement 4. Results of sensitivity analysis.....                                                                                                | 60 |
| Supplement 4 Table 1. Results of sensitivity analysis of LTL on CSVD .....                                                                        | 60 |
| Supplement 4 Table 2. Results of sensitivity analysis of GrimAge on CSVD.....                                                                     | 61 |
| Supplement 4 Table 3. Results of sensitivity analysis of PhenoAge on CSVD ...                                                                     | 61 |
| Supplement 4 Table 4. Results of sensitivity analysis of HannumAge on CSVD                                                                        | 62 |
| Supplement 4 Table 5. Results of sensitivity analysis of Intrinsic HorvathAge acceleration on CSVD .....                                          | 62 |

## **Supplement 1. GWAS data sets used in the present MR analysis**

| <b>Traits</b>                        | <b>PubMed ID</b> | <b>Population<br/>(Proportion)</b> | <b>Sample size<br/>or<br/>Cases/Controls</b> |
|--------------------------------------|------------------|------------------------------------|----------------------------------------------|
| LTL                                  | 34611362         | European<br>(94%)                  | 472174                                       |
| GrimAge                              | 34187551         | European                           | 34710                                        |
| PhenoAge                             | 34187551         | European                           | 34710                                        |
| HannumAge                            | 34187551         | European                           | 34710                                        |
| Intrinsic HorvathAge<br>acceleration | 34187551         | European                           | 34710                                        |
| WMH volume                           | 32358547         | European                           | 18381                                        |
| FA                                   | 32358547         | European                           | 17663                                        |
| MD                                   | 32358547         | European                           | 17467                                        |
| lacunar stroke                       | 33773637         | European                           | 6030/248929                                  |
| all location BMB                     | 32913026         | European<br>(94%)                  | 3556/25806                                   |
| lobar BMB                            | 32913026         | European<br>(94%)                  | 2179/25806                                   |
| mixed or deep BMB                    | 32913026         | European<br>(94%)                  | 1293/25806                                   |
| all location ICH or SVS              | 31430377         | European                           | 6255/233058                                  |
| lobar ICH or SVS                     | 31430377         | European                           | 5240/233058                                  |
| non-lobar ICH or SVS                 | 31430377         | European                           | 5500/233058                                  |

**Supplement 2.** The single SNP analysis and leave-one-out analysis for exposures on outcomes

Supplement 2 Figure 1. The single SNP analysis and leave-one-out analysis for LTL on WMH volume

(a) Forest plot of single SNP MR



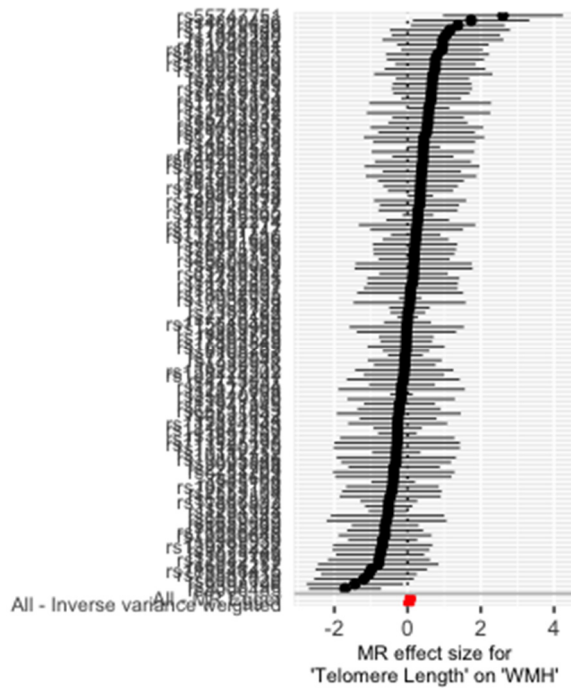

(b) Leave-one-out analysis

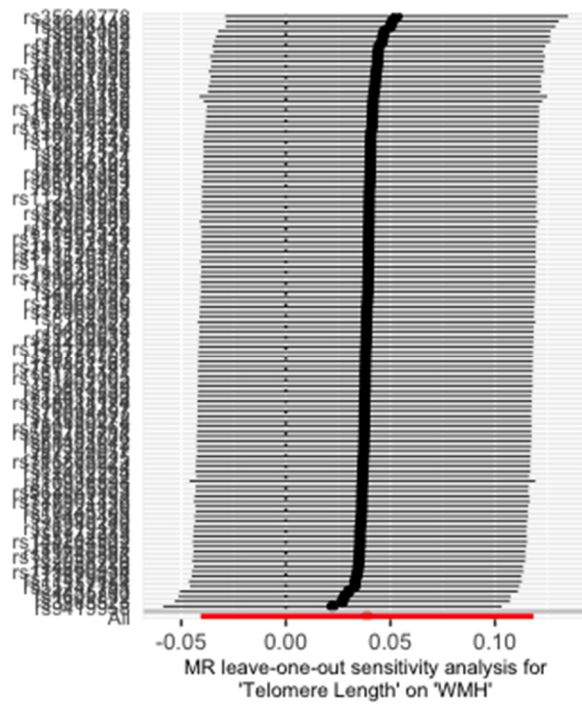

Supplement 2 Figure 2. The single SNP analysis and leave-one-out analysis for LTL on FA  
(a) Forest plot of single SNP MR

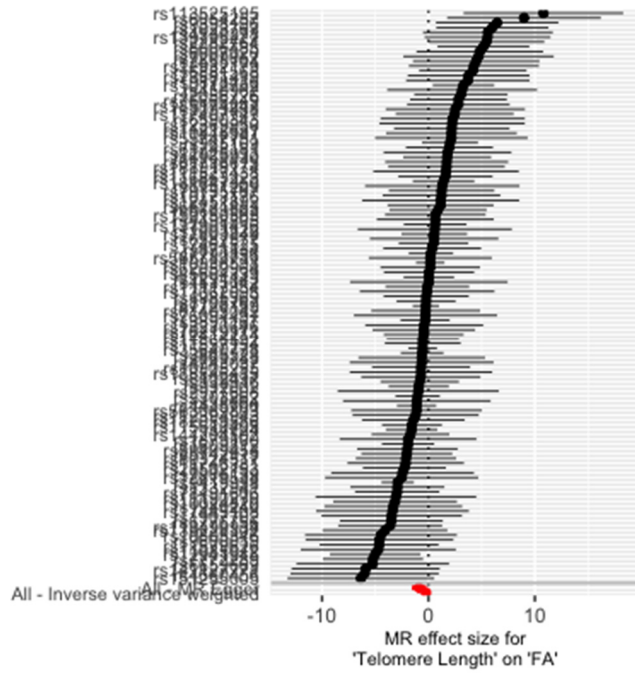

(b) Leave-one-out analysis

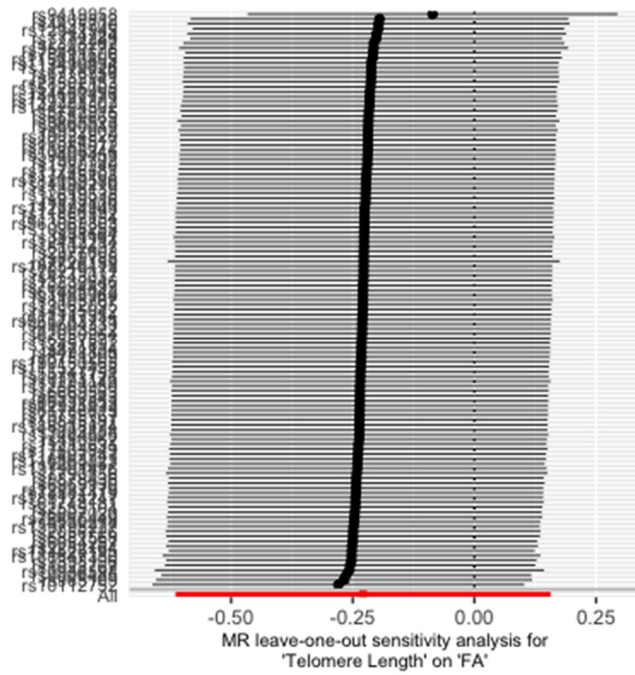

Supplement 2 Figure 3. The single SNP analysis and leave-one-out analysis for LTL on MD

(a) Forest plot of single SNP MR

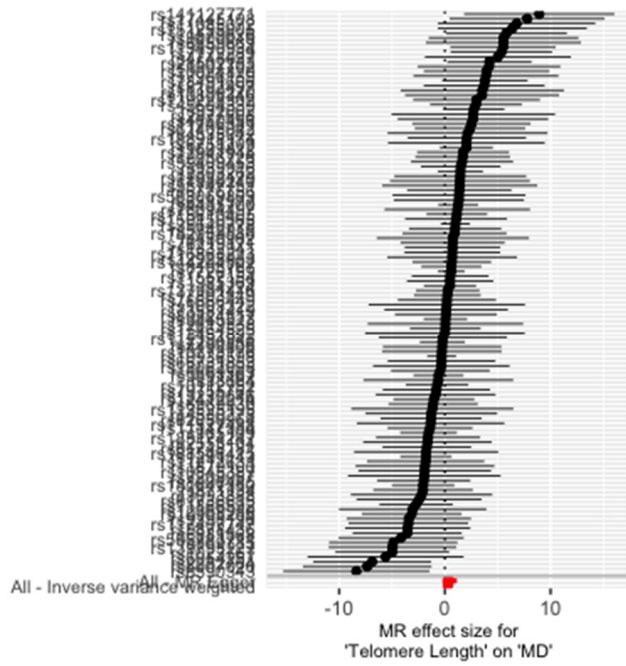

(b) Leave-one-out analysis

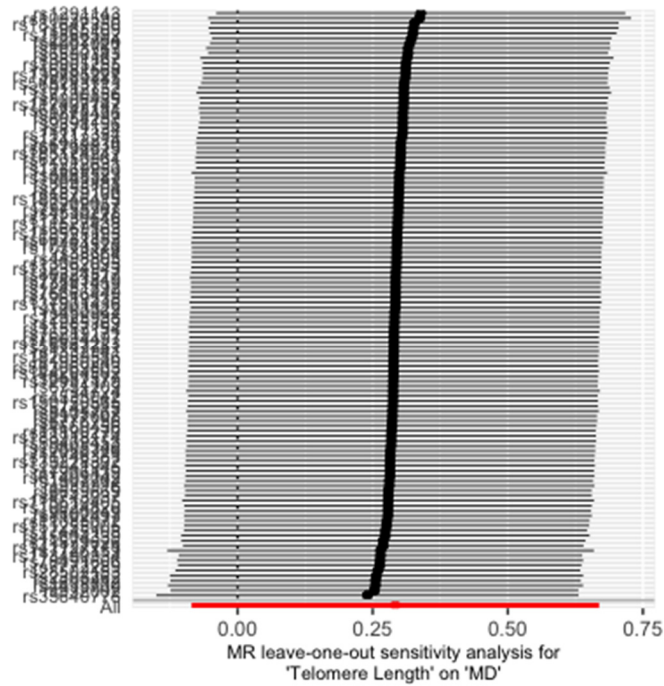

Supplement 2 Figure 4. The single SNP analysis and leave-one-out analysis for LTL on lacunar stroke

(a) Forest plot of single SNP MR

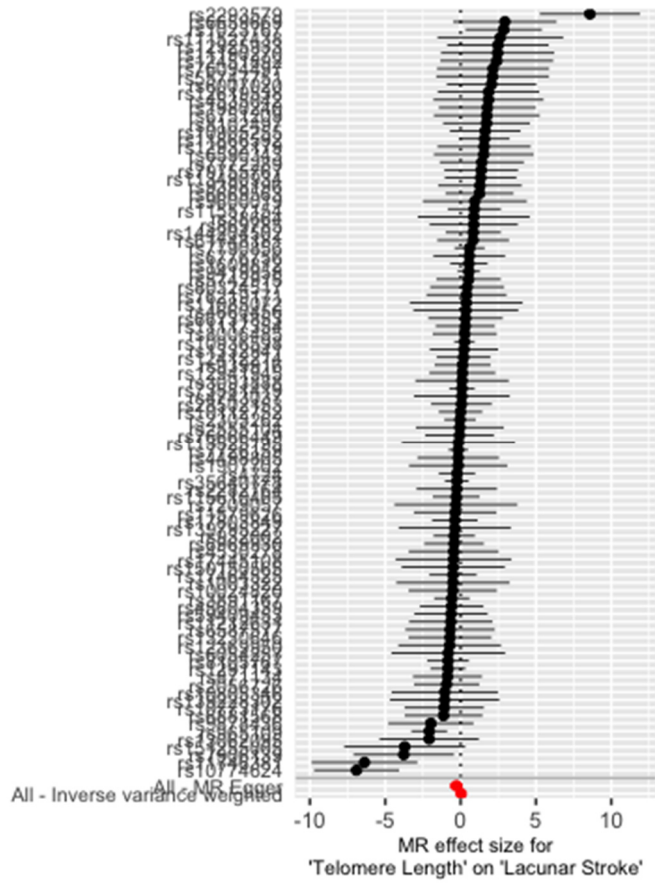

(b) Leave-one-out analysis

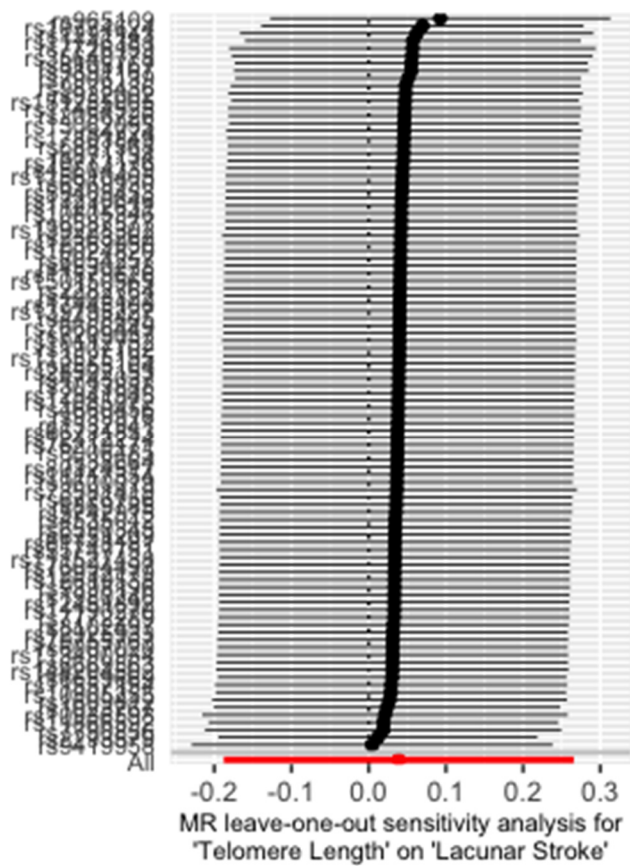

Supplement 2 Figure 5. The single SNP analysis and leave-one-out analysis for LTL on all location BMB

(a) Forest plot of single SNP MR

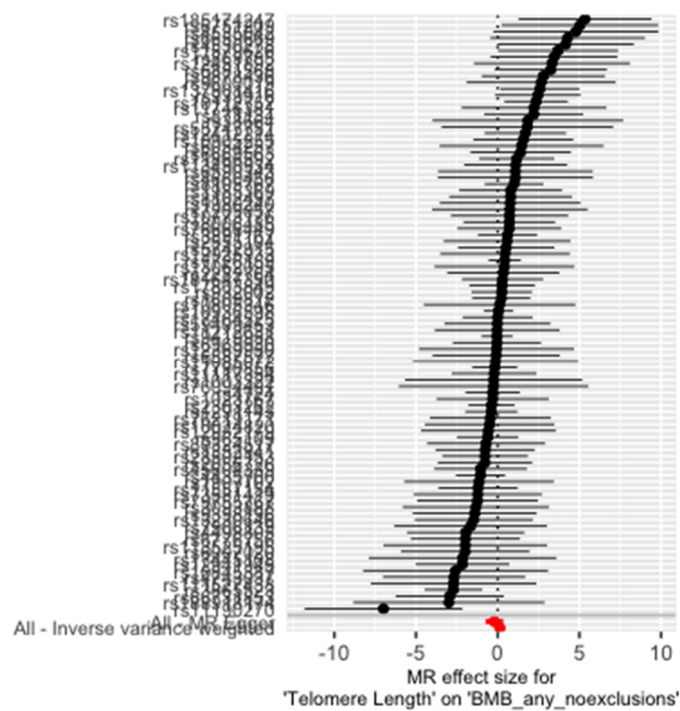

(b) Leave-one-out analysis

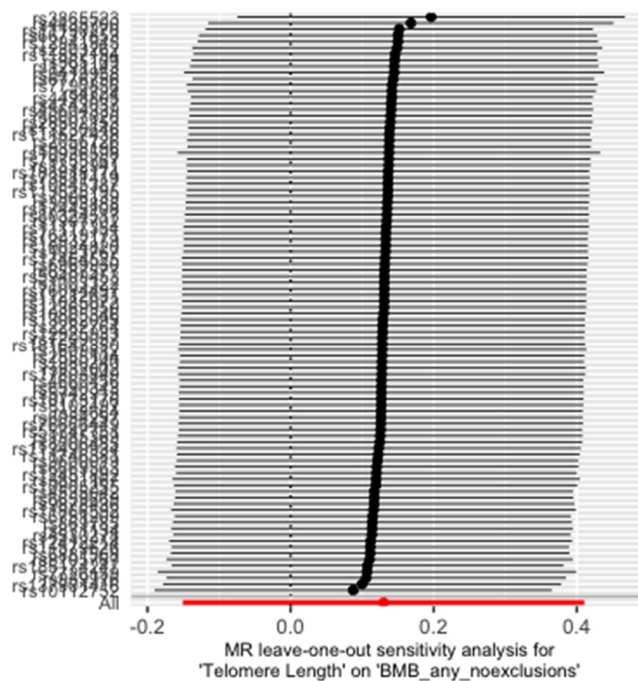

Supplement 2 Figure 6. The single SNP analysis and leave-one-out analysis for LTL on lobar BMB

(a) Forest plot of single SNP MR

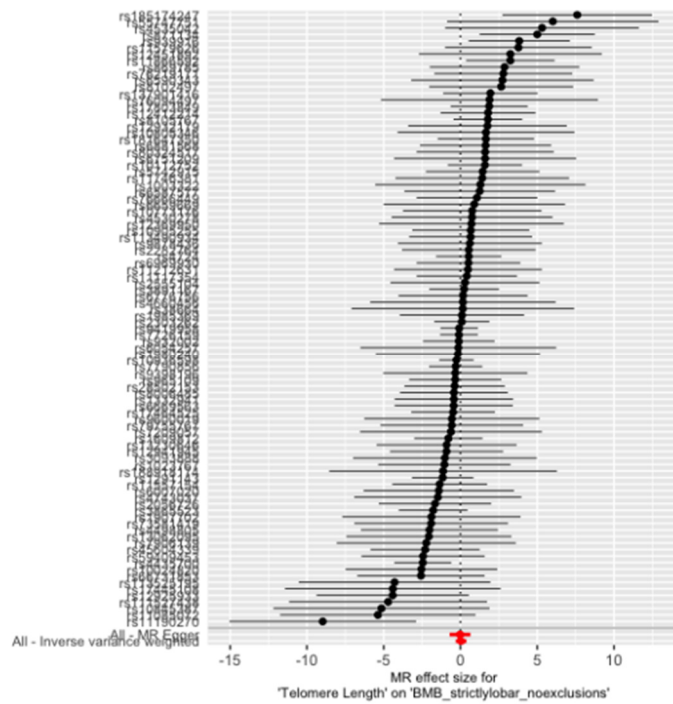

(b) Leave-one-out analysis

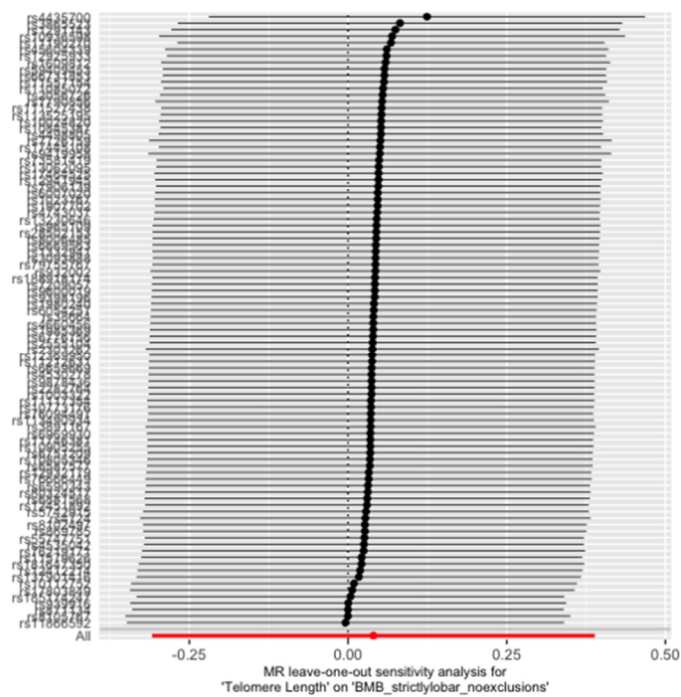

Supplement 2 Figure 7. The single SNP analysis and leave-one-out analysis for LTL on mixed or deep BMB

(a) Forest plot of single SNP MR

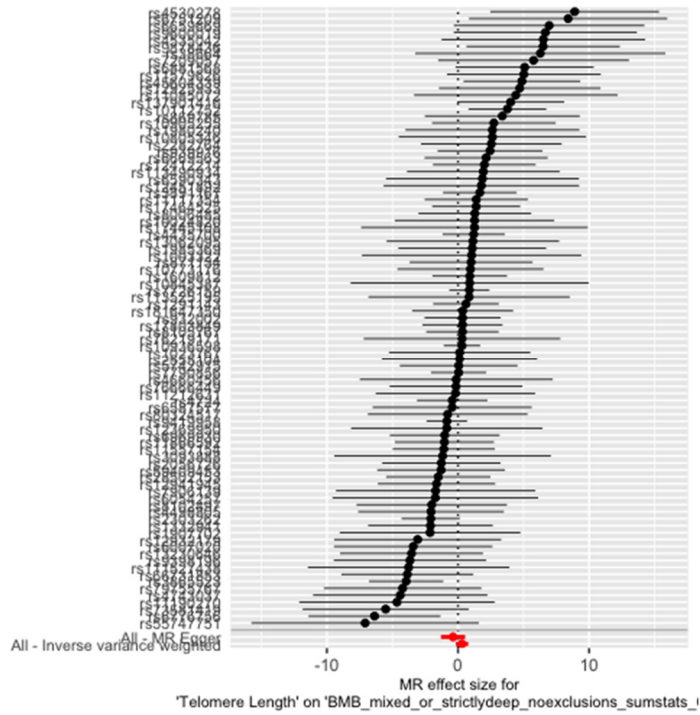

(b) Leave-one-out analysis

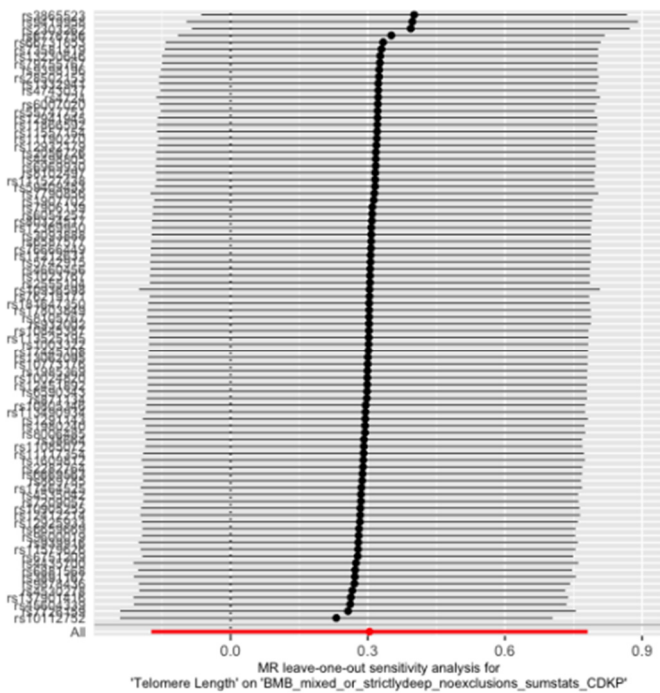

Supplement 2 Figure 8. The single SNP analysis and leave-one-out analysis for LTL on all location ICH or SVS

(a) Forest plot of single SNP MR



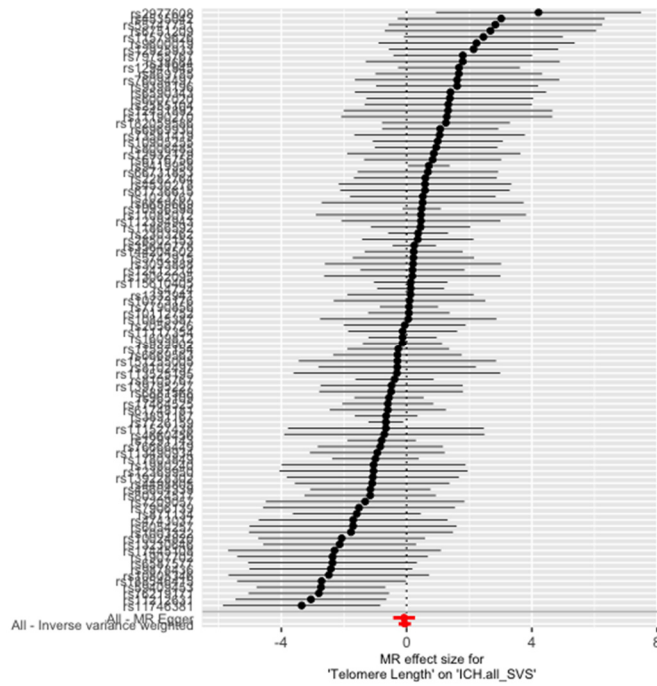

(b) Leave-one-out analysis

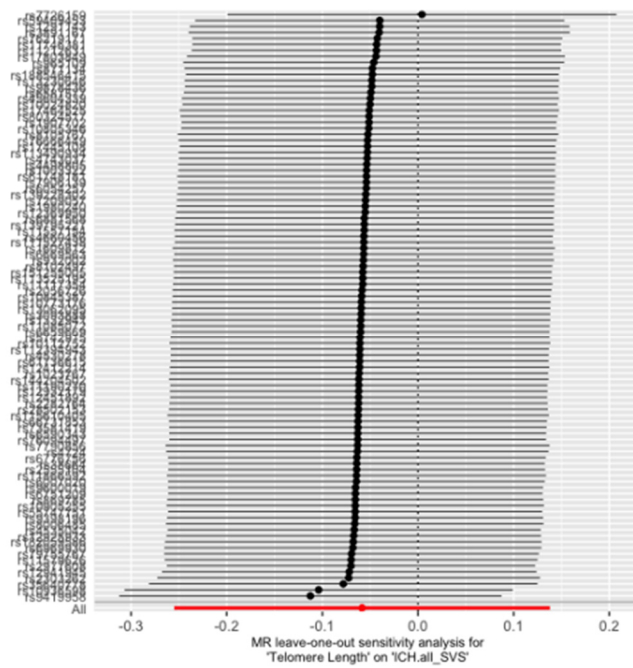

Supplement 2 Figure 9. The single SNP analysis and leave-one-out analysis for LTL on lobar ICH or SVS

(a) Forest plot of single SNP MR



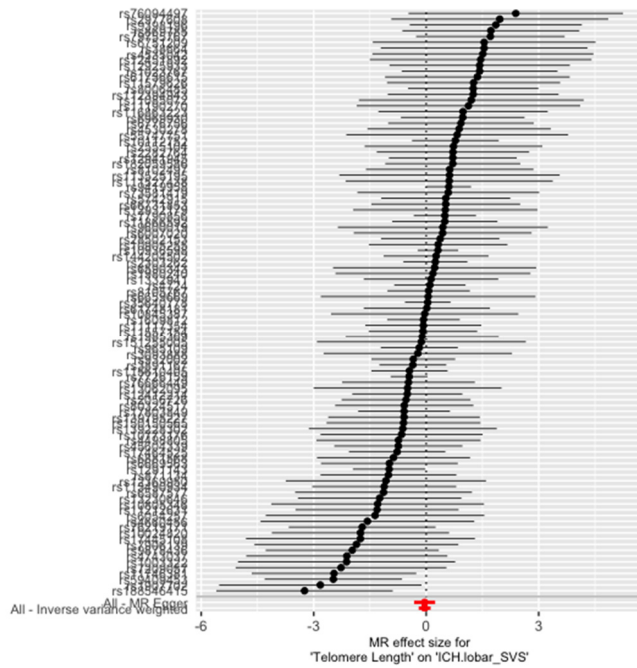

(b) Leave-one-out analysis

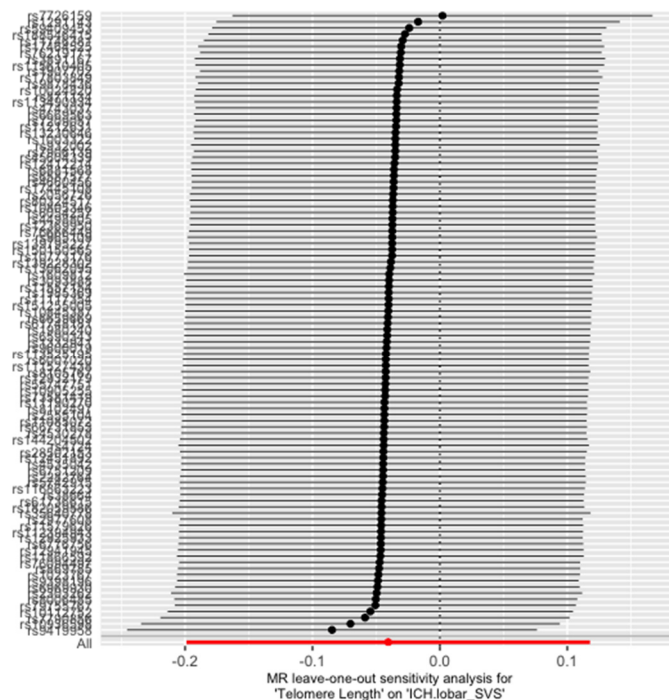

Supplement 2 Figure 10. The single SNP analysis and leave-one-out analysis for LTL on non-lobar ICH or SVS

(a) Forest plot of single SNP MR

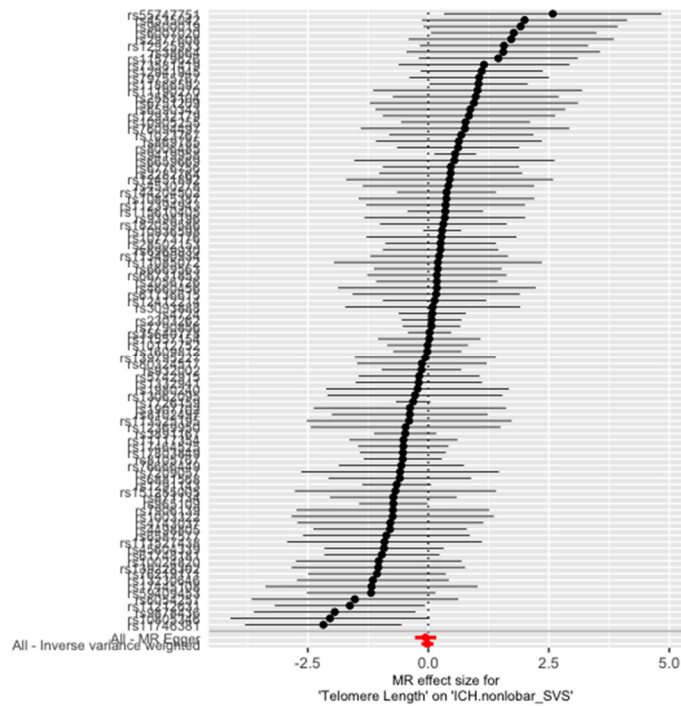

(b) Leave-one-out analysis

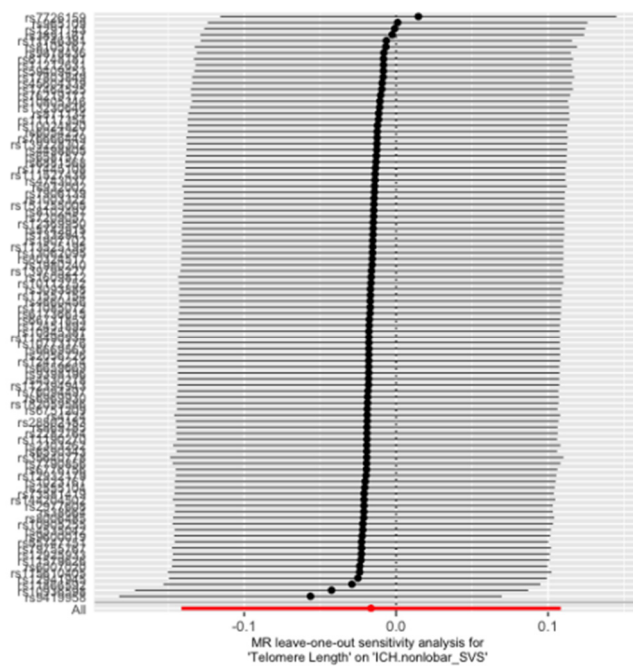

Supplement 2 Figure 11. The single SNP analysis and leave-one-out analysis for GrimAge on WMH volume

(a) Forest plot of single SNP MR

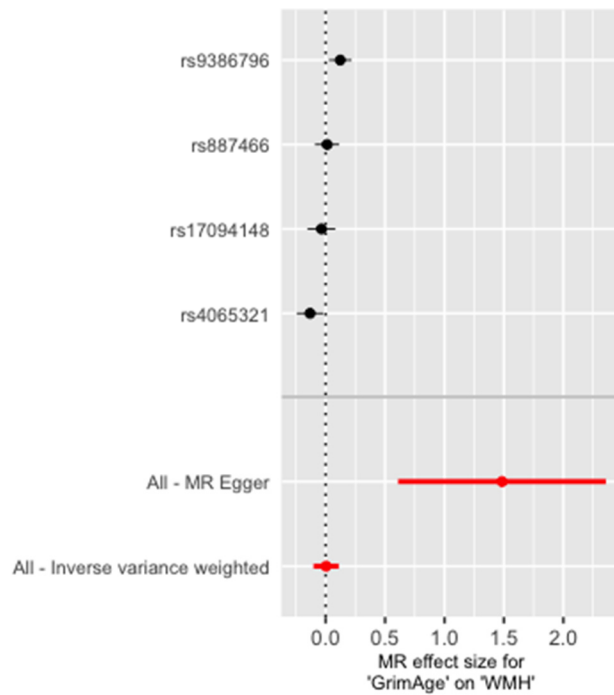

(b) Leave-one-out analysis

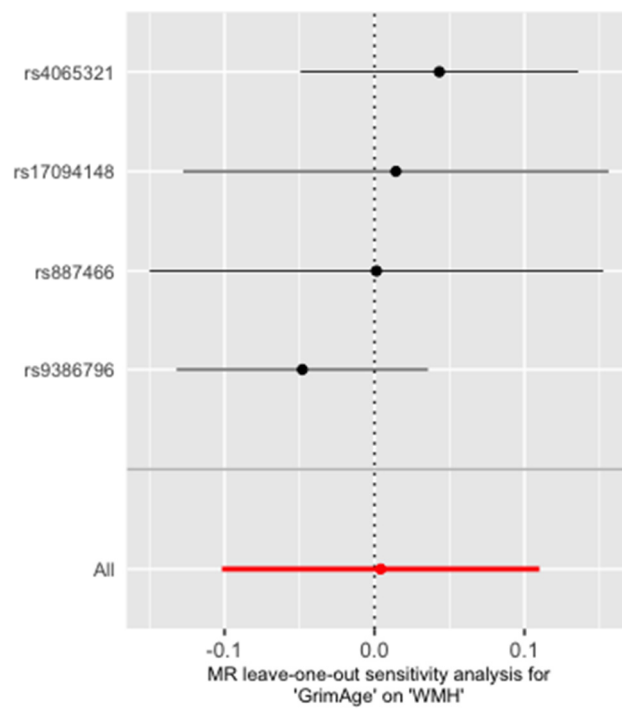

Supplement 2 Figure 12. The single SNP analysis and leave-one-out analysis for GrimAge on FA

(a) Forest plot of single SNP MR

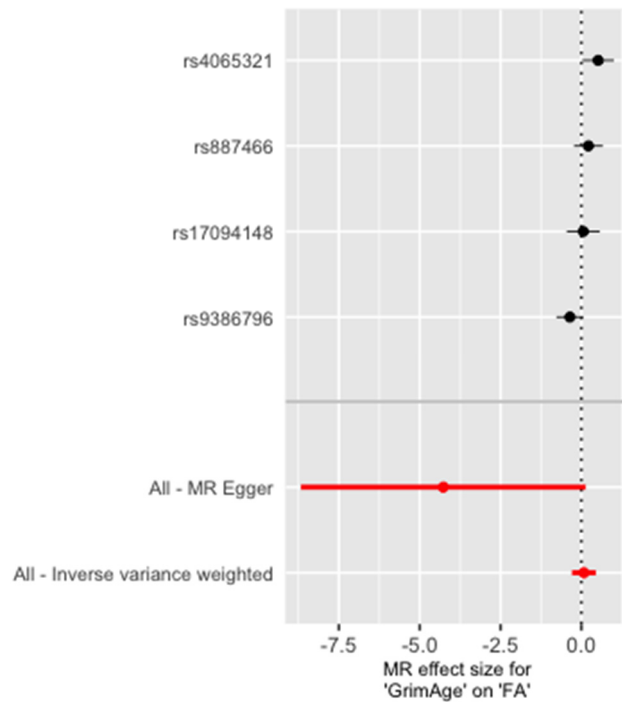

(b) Leave-one-out analysis

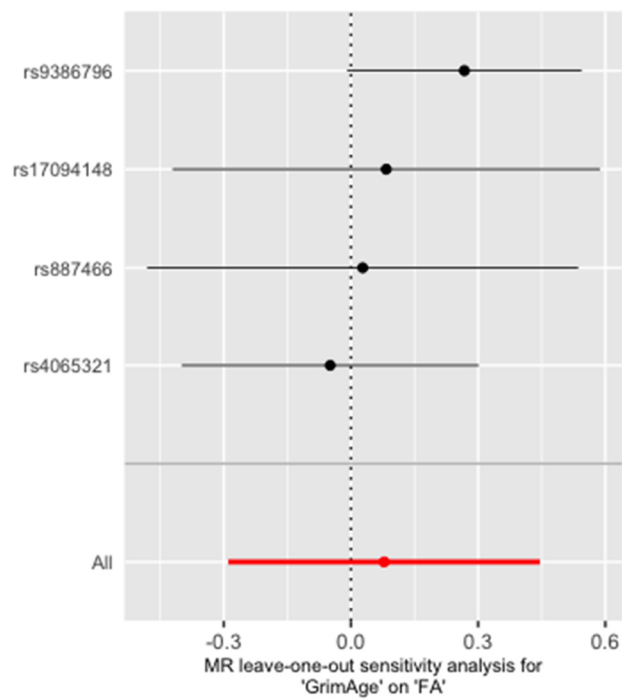

Supplement 2 Figure 13. The single SNP analysis and leave-one-out analysis for GrimAge on MD

(a) Forest plot of single SNP MR

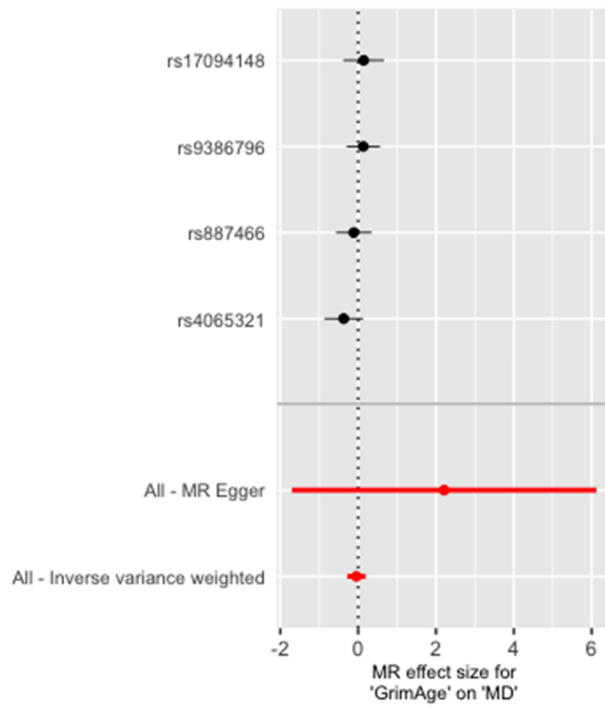

(b) Leave-one-out analysis

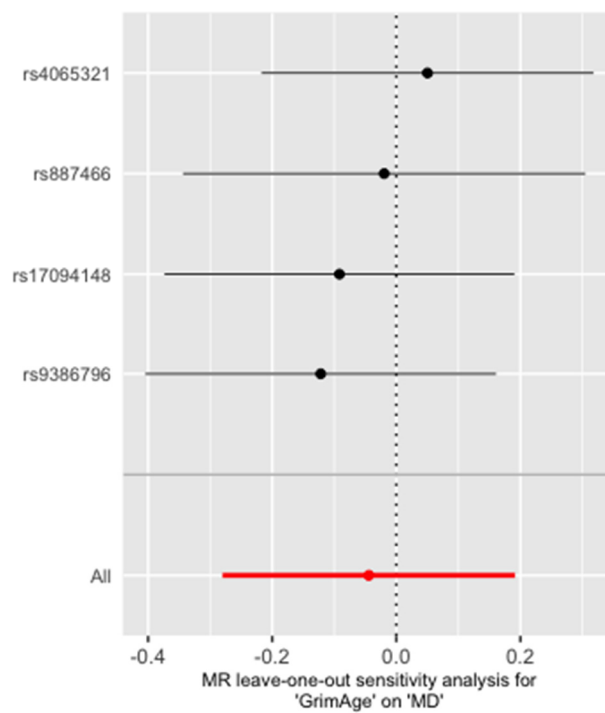

Supplement 2 Figure 14. The single SNP analysis and leave-one-out analysis for GrimAge on lacunar stroke

(a) Forest plot of single SNP MR

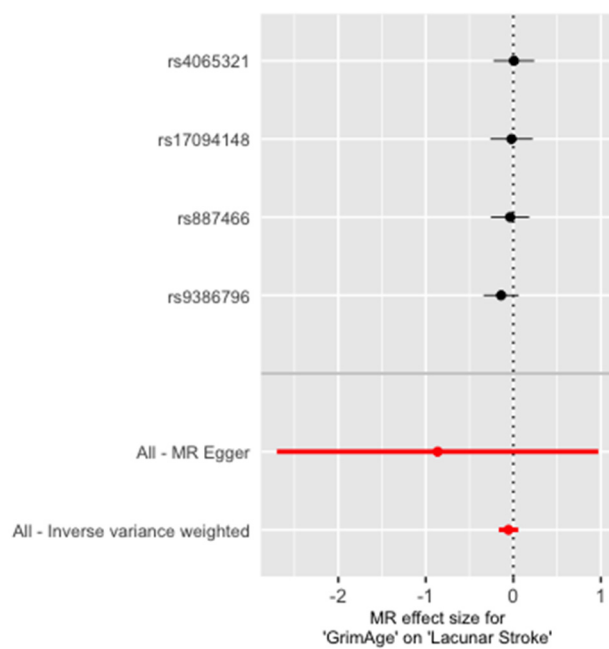

(b) Leave-one-out analysis

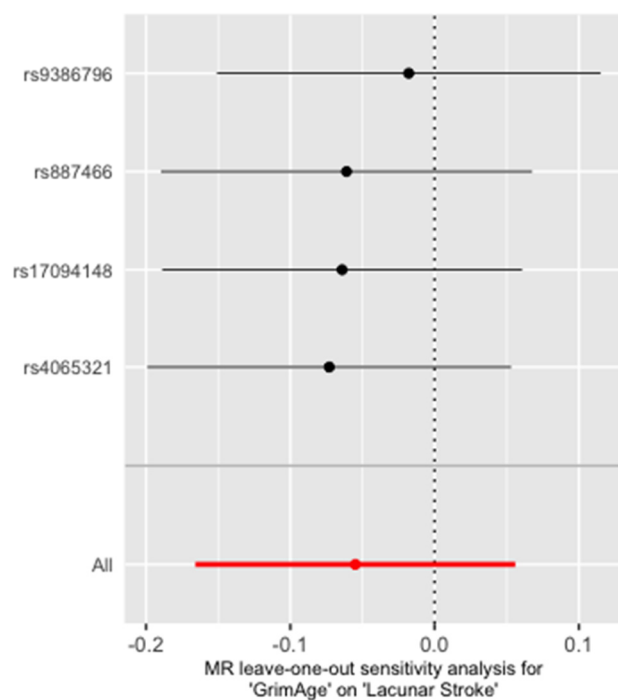

Supplement 2 Figure 15. The single SNP analysis and leave-one-out analysis for GrimAge on all location BMB

(a) Forest plot of single SNP MR

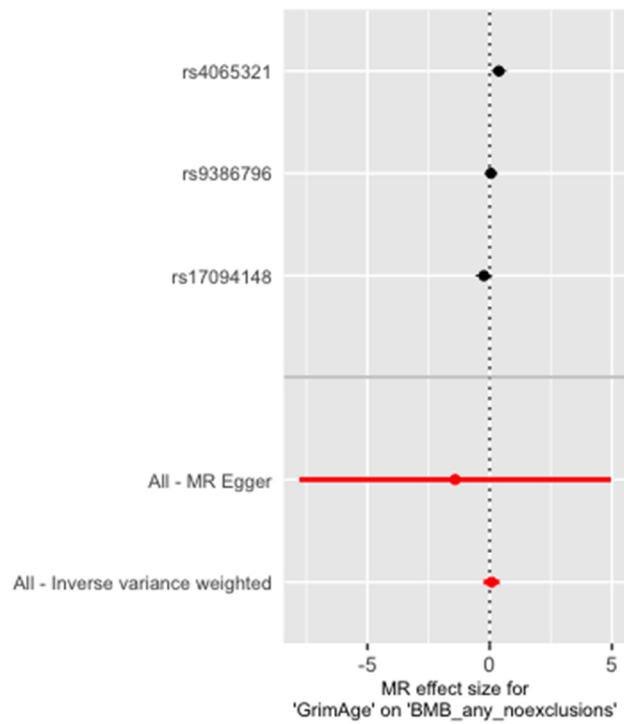

(b) Leave-one-out analysis

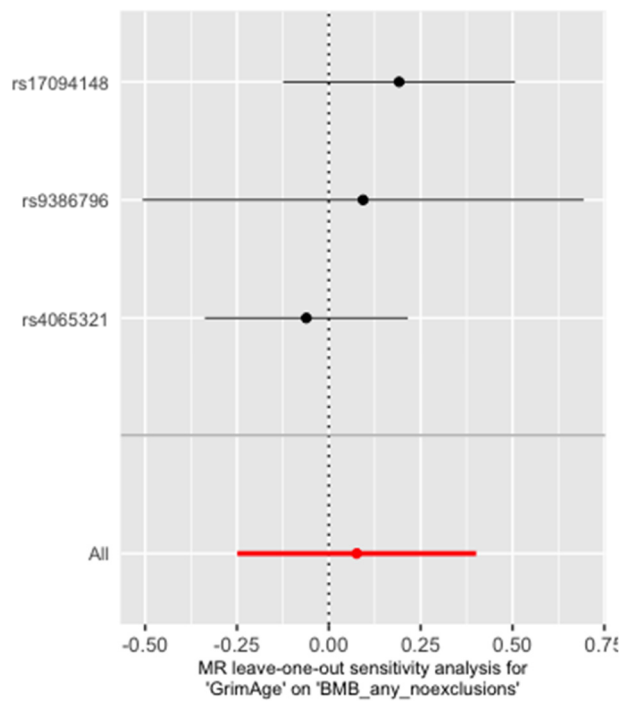

Supplement 2 Figure 16. The single SNP analysis and leave-one-out analysis for GrimAge on lobar BMB

(a) Forest plot of single SNP MR

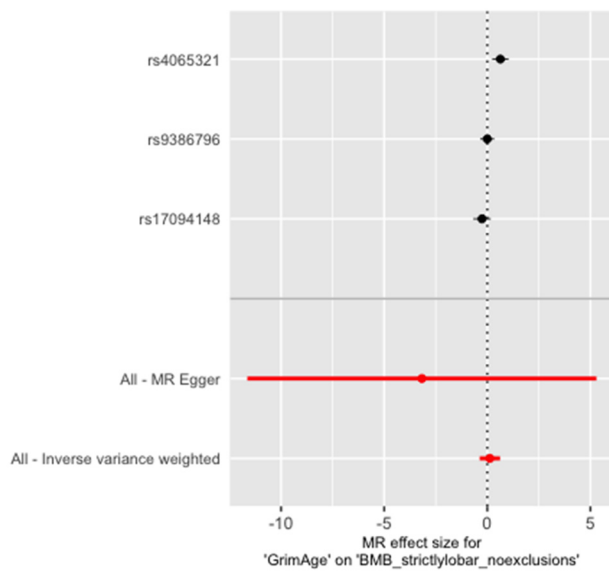

(b) Leave-one-out analysis

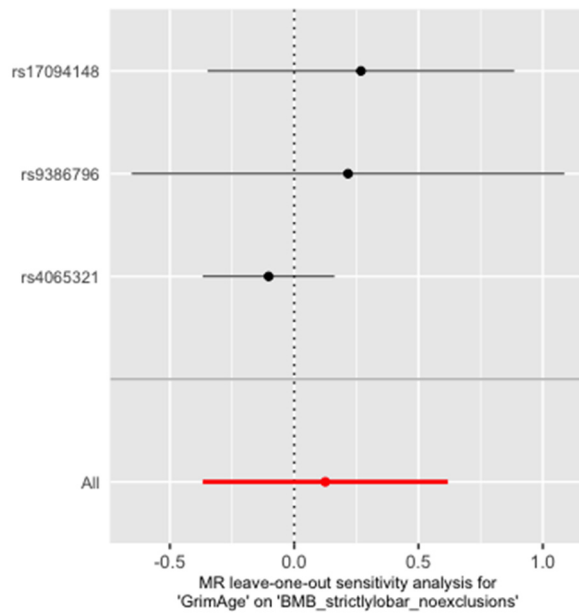

Supplement 2 Figure 17. The single SNP analysis and leave-one-out analysis for GrimAge on mixed or deep BMB

(a) Forest plot of single SNP MR



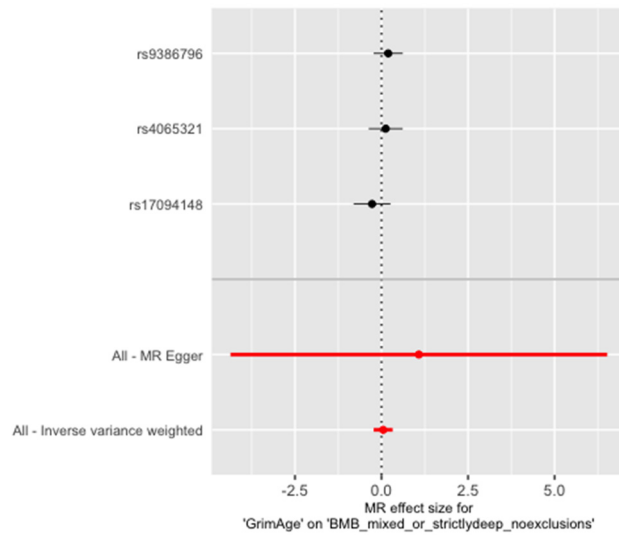

(b) Leave-one-out analysis

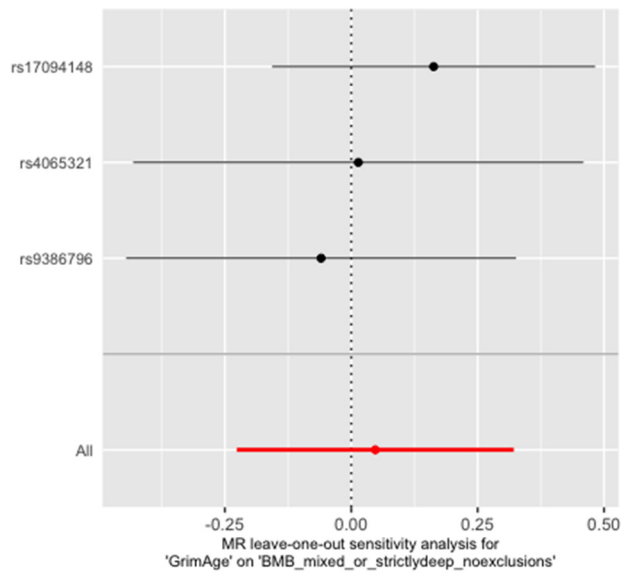

Supplement 2 Figure 18. The single SNP analysis and leave-one-out analysis for GrimAge on all location ICH or SVS

(a) Forest plot of single SNP MR

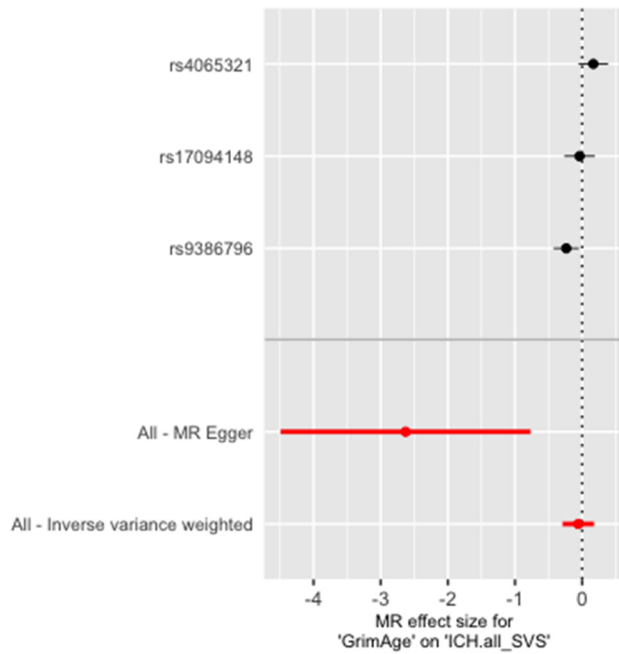

(b) Leave-one-out analysis

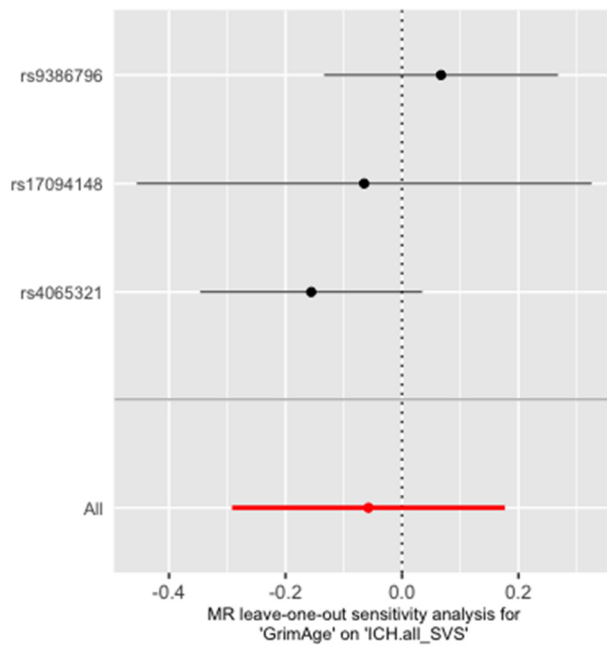

Supplement 2 Figure 19. The single SNP analysis and leave-one-out analysis for GrimAge on lobar ICH or SVS

(a) Forest plot of single SNP MR

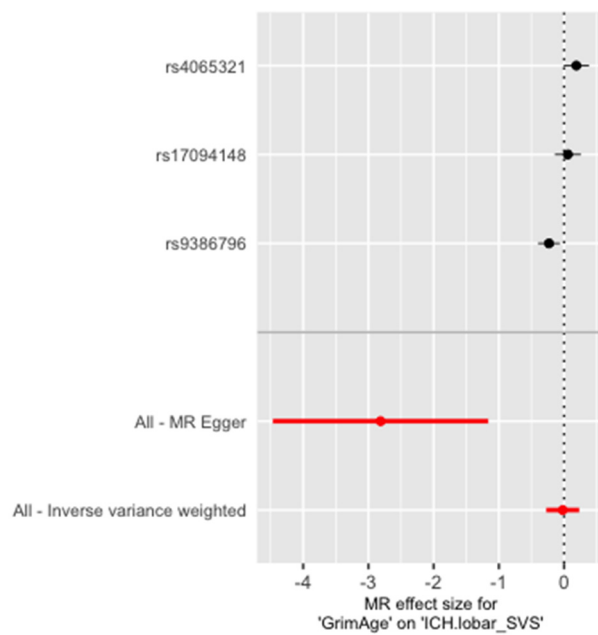

(b) Leave-one-out analysis

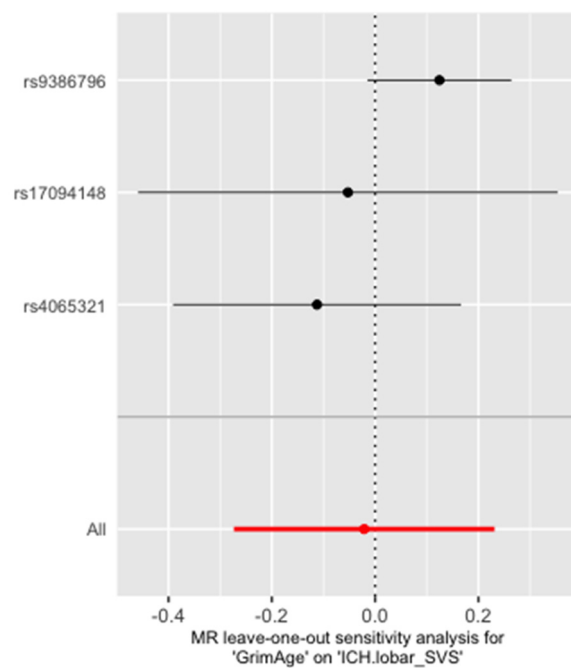

Supplement 2 Figure 20. The single SNP analysis and leave-one-out analysis for GrimAge on non-lobar ICH or SVS

(a) Forest plot of single SNP MR

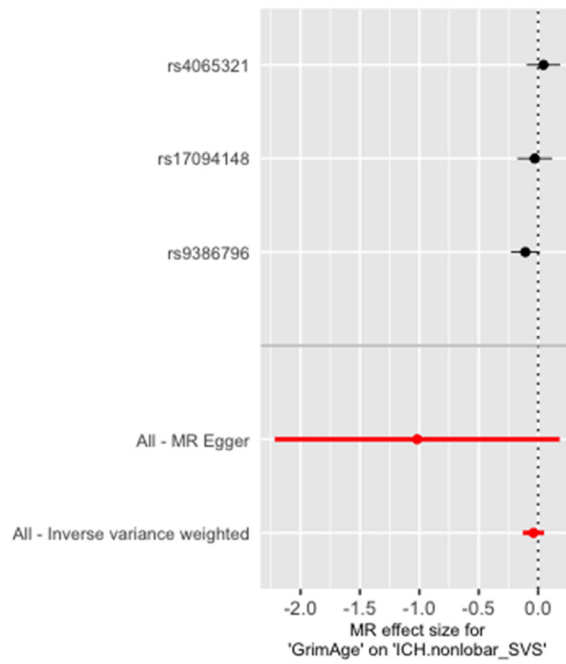

(b) Leave-one-out analysis

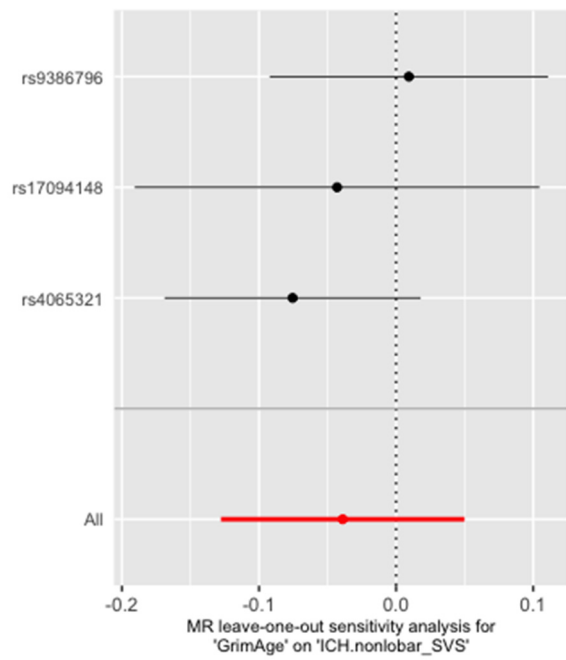

Supplement 2 Figure 21. The single SNP analysis and leave-one-out analysis for PhenoAge on WMH volume

(a) Forest plot of single SNP MR

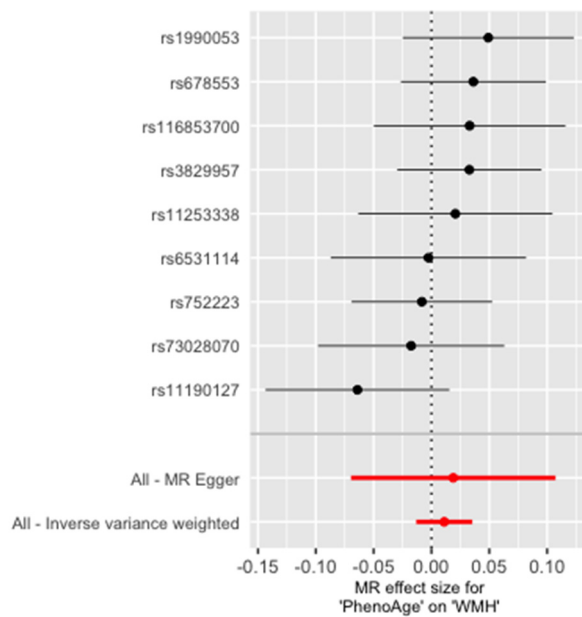

(b) Leave-one-out analysis

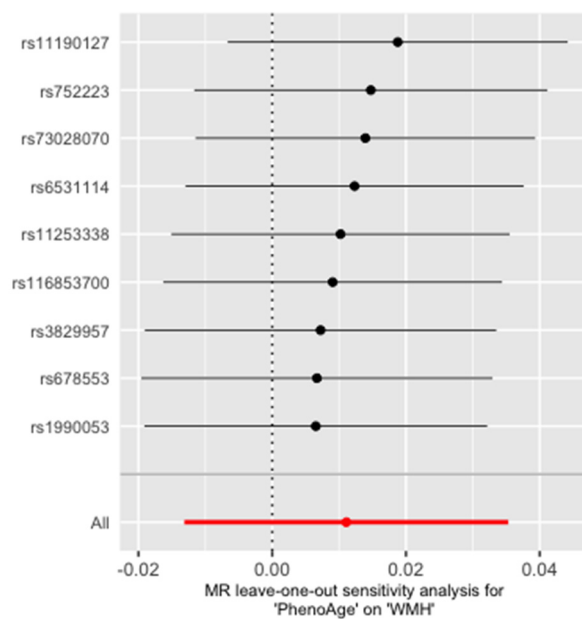

Supplement 2 Figure 22. The single SNP analysis and leave-one-out analysis for PhenoAge on FA

(a) Forest plot of single SNP MR

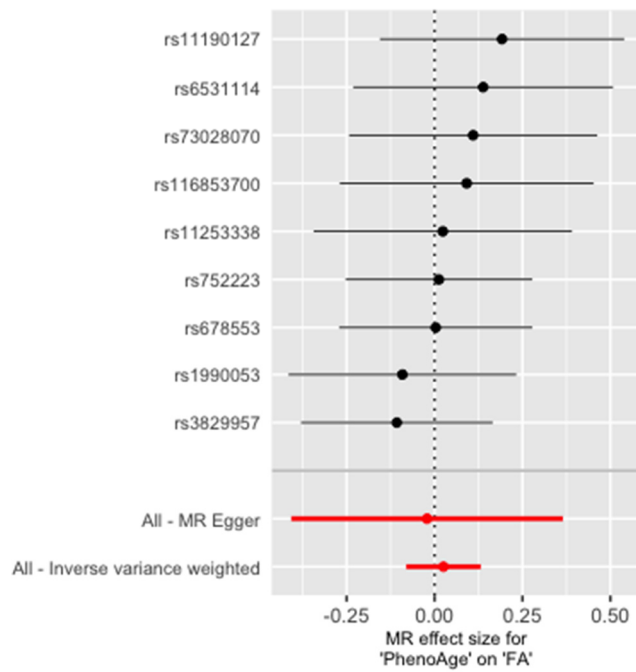

(b) Leave-one-out analysis

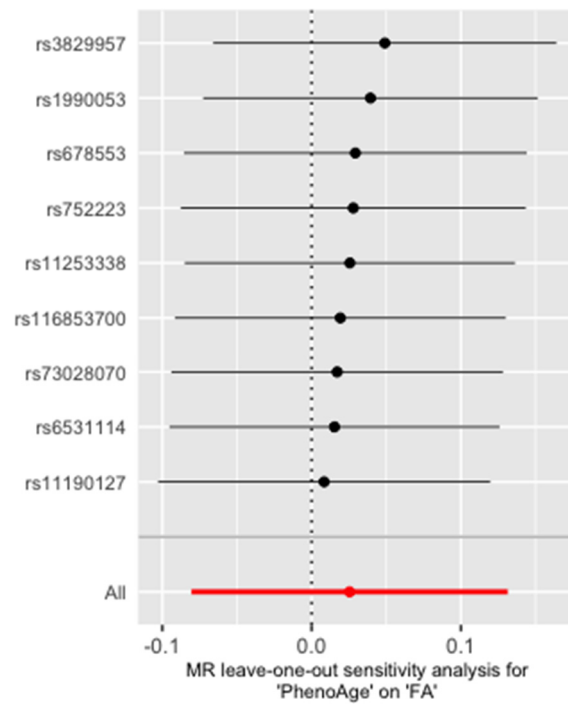

Supplement 2 Figure 23. The single SNP analysis and leave-one-out analysis for PhenoAge on MD

(a) Forest plot of single SNP MR

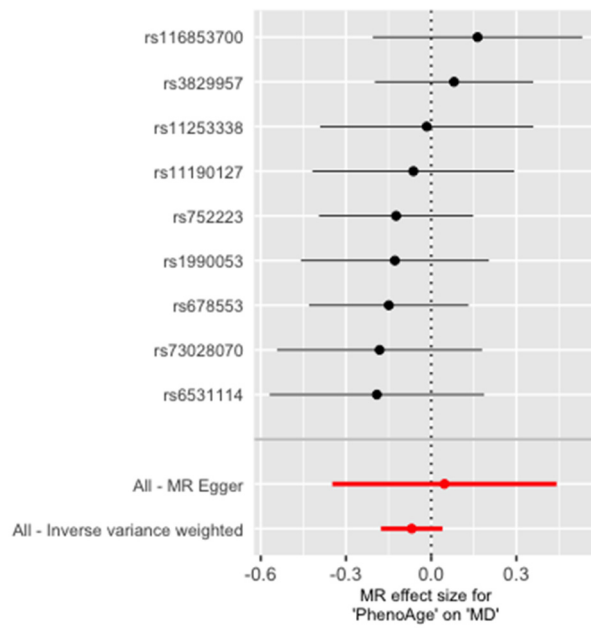

(b) Leave-one-out analysis

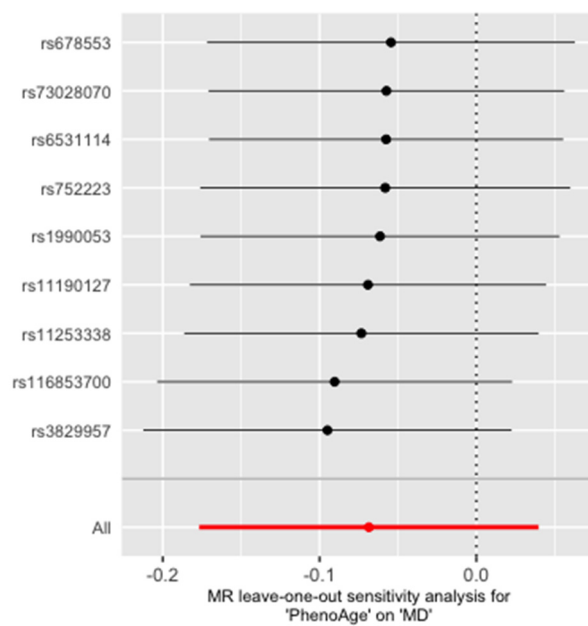

Supplement 2 Figure 24. The single SNP analysis and leave-one-out analysis for PhenoAge on lacunar stroke

(a) Forest plot of single SNP MR

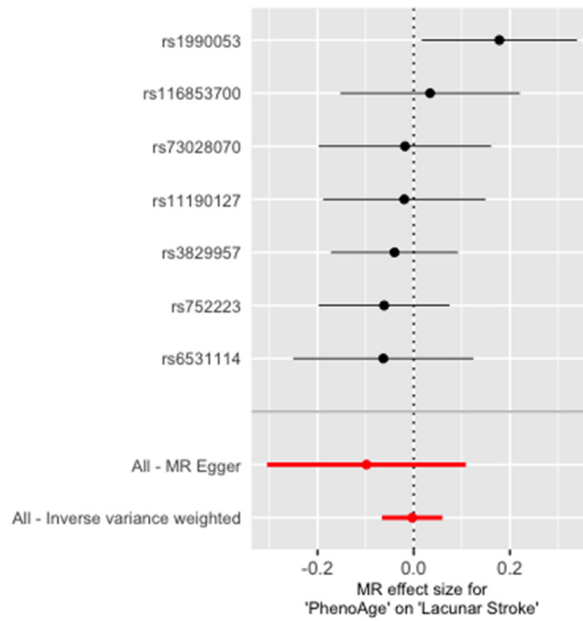

(b) Leave-one-out analysis

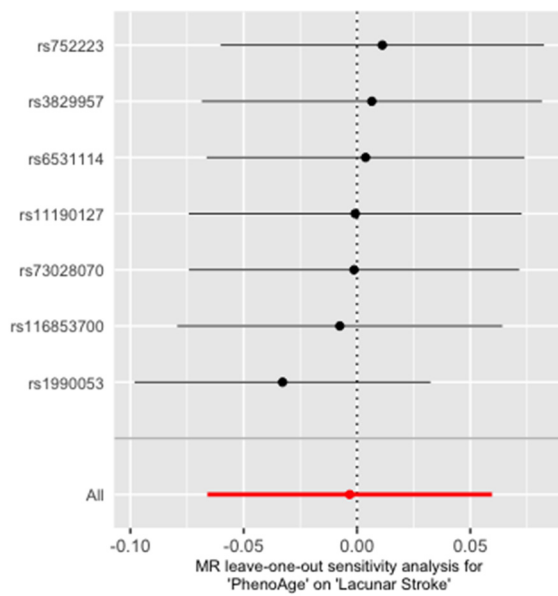

Supplement 2 Figure 25. The single SNP analysis and leave-one-out analysis for PhenoAge on all location BMB

(a) Forest plot of single SNP MR



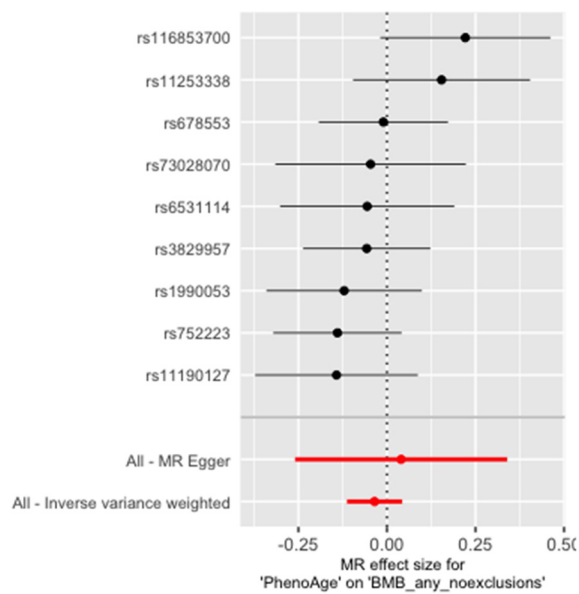

## (b) Leave-one-out analysis

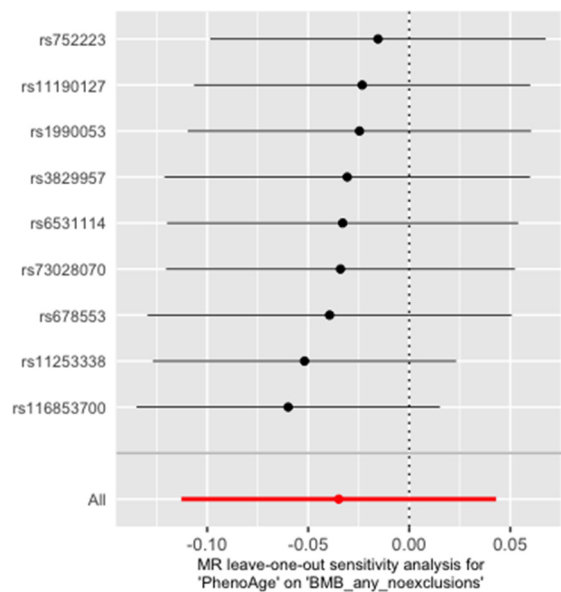

Supplement 2 Figure 26. The single SNP analysis and leave-one-out analysis for PhenoAge on lobar BMB

## (a) Forest plot of single SNP MR

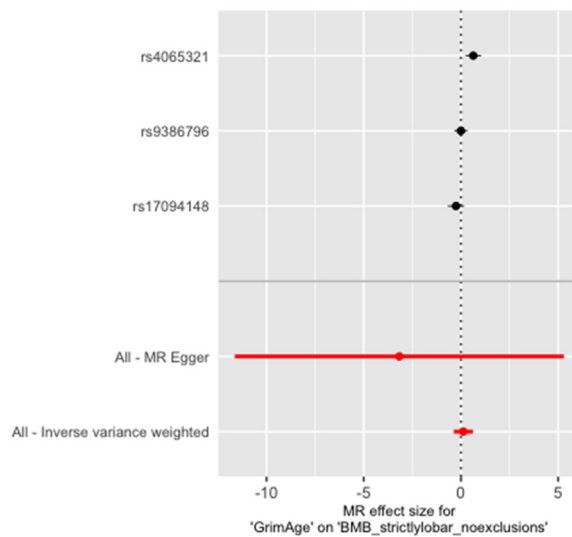

(b) Leave-one-out analysis

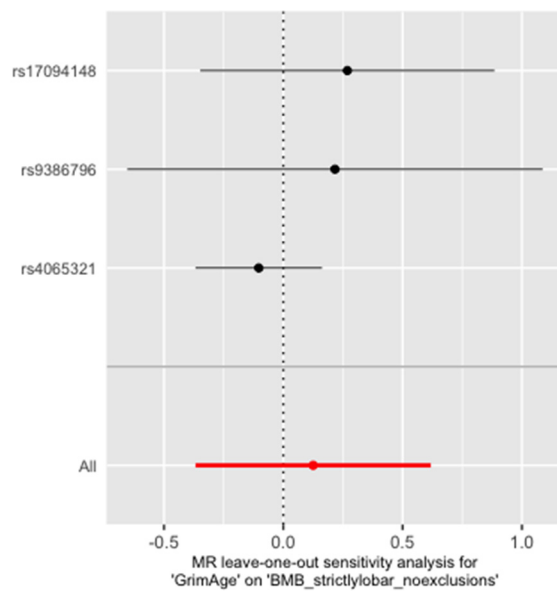

Supplement 2 Figure 27. The single SNP analysis and leave-one-out analysis for PhenoAge on mixed or deep BMB

(a) Forest plot of single SNP MR

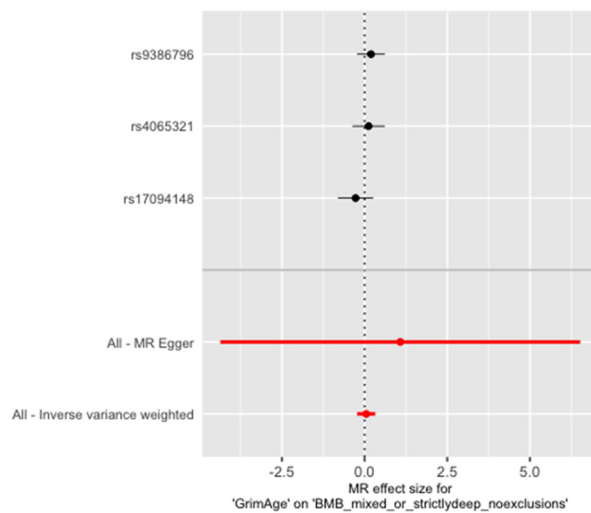

(b) Leave-one-out analysis

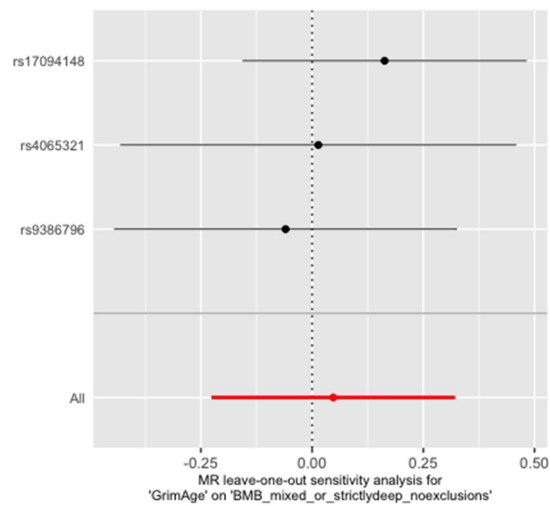

Supplement 2 Figure 28. The single SNP analysis and leave-one-out analysis for PhenoAge on all location ICH or SVS

(a) Forest plot of single SNP MR

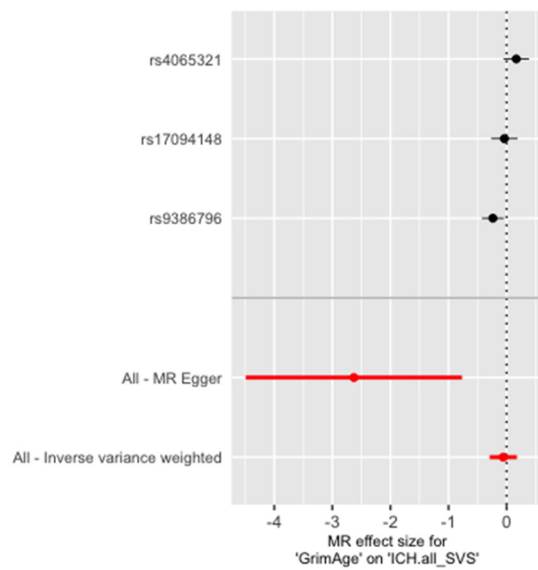

(b) Leave-one-out analysis

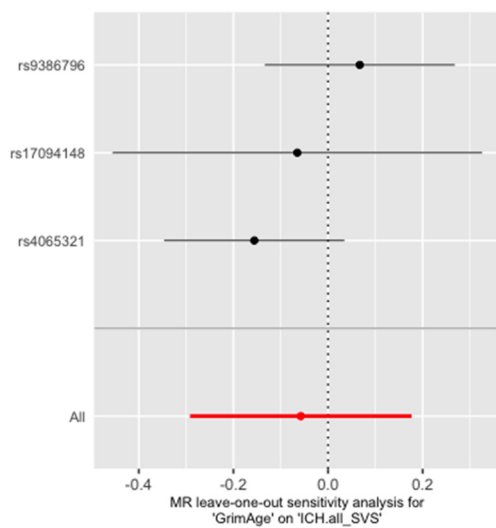

Supplement 2 Figure 29. The single SNP analysis and leave-one-out analysis for PhenoAge on lobar ICH or SVS

(a) Forest plot of single SNP MR

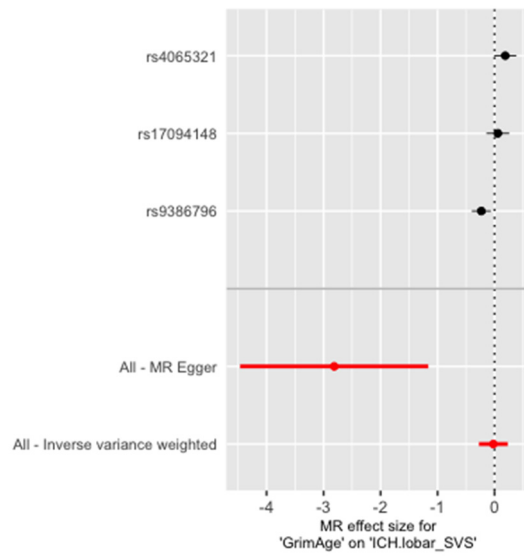

(b) Leave-one-out analysis

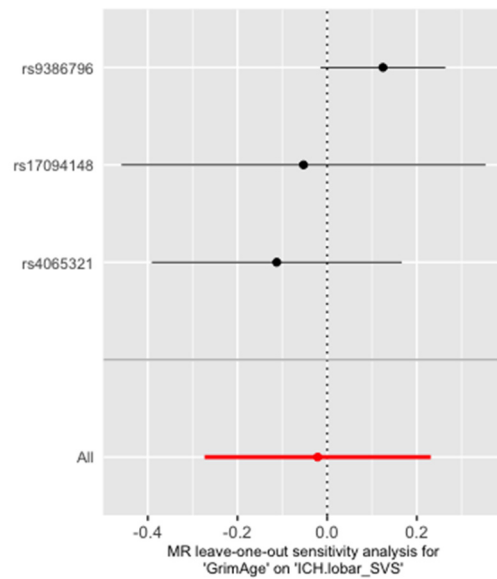

Supplement 2 Figure 30. The single SNP analysis and leave-one-out analysis for PhenoAge on non-lobar ICH or SVS

(a) Forest plot of single SNP MR

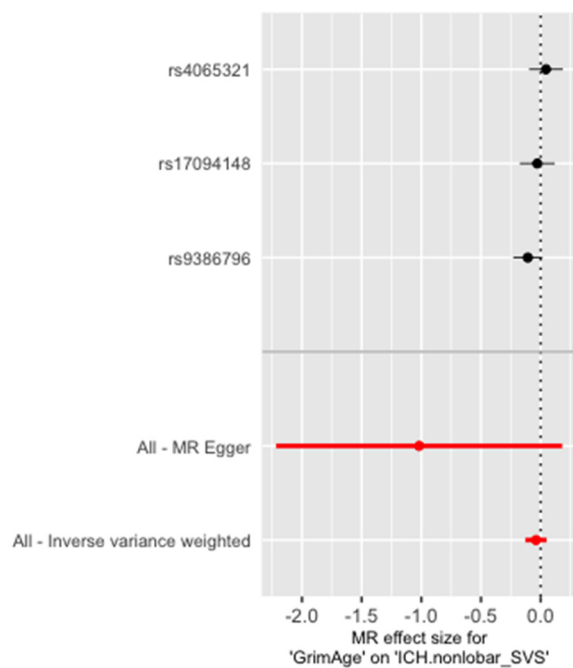

(b) Leave-one-out analysis

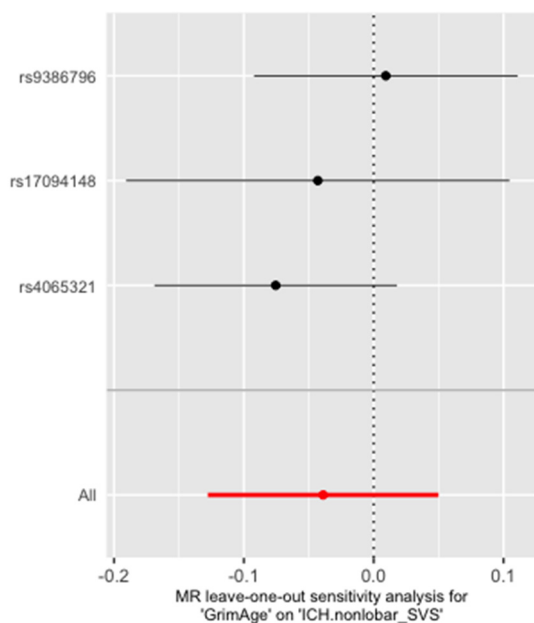

Supplement 2 Figure 31. The single SNP analysis and leave-one-out analysis for HannumAge on WMH volume

(a) Forest plot of single SNP MR

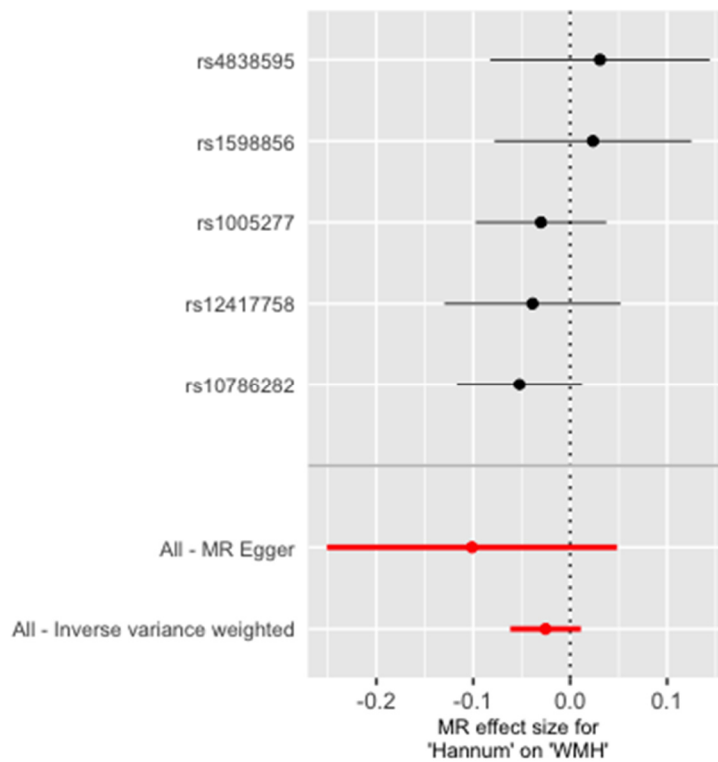

(b) Leave-one-out analysis

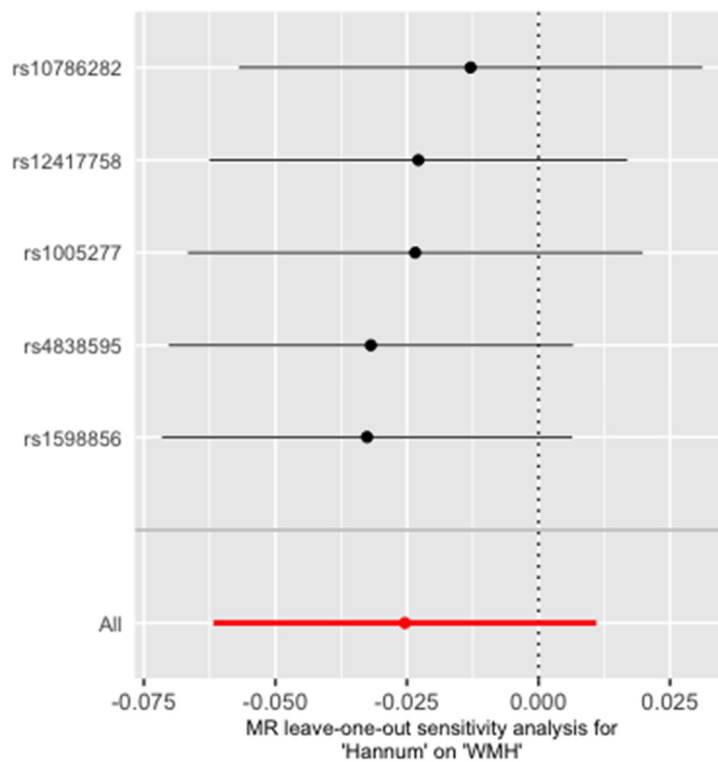

Supplement 2 Figure 32. The single SNP analysis and leave-one-out analysis for HannumAge on FA

(a) Forest plot of single SNP MR

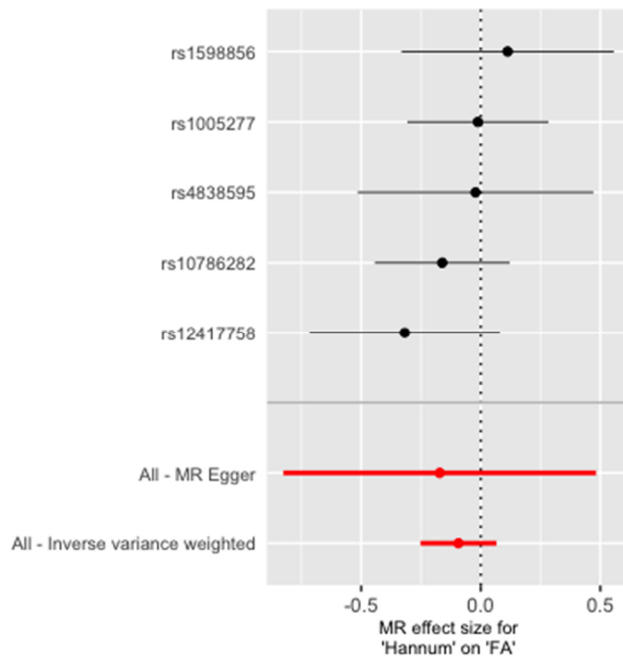

(b) Leave-one-out analysis

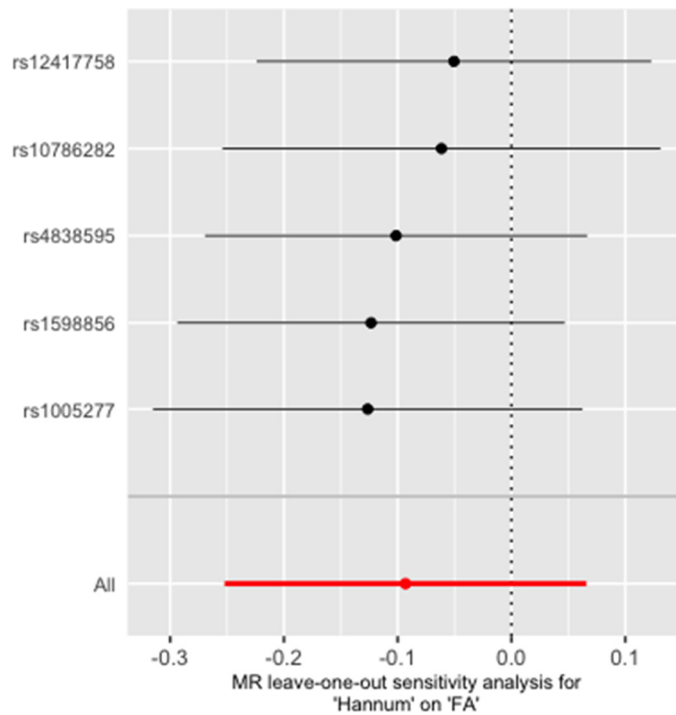

Supplement 2 Figure 33. The single SNP analysis and leave-one-out analysis for HannumAge on MD

(a) Forest plot of single SNP MR



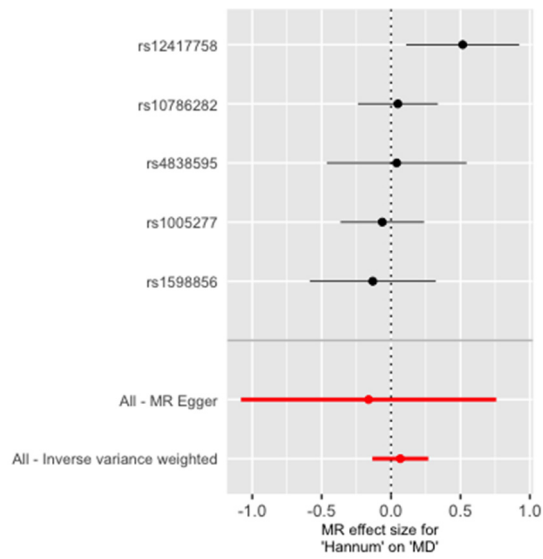

(b) Leave-one-out analysis

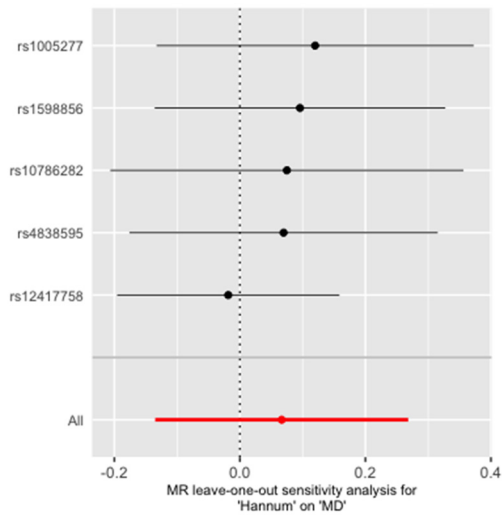

Supplement 2 Figure 34. The single SNP analysis and leave-one-out analysis for HannumAge on lacunar stroke

(a) Forest plot of single SNP MR

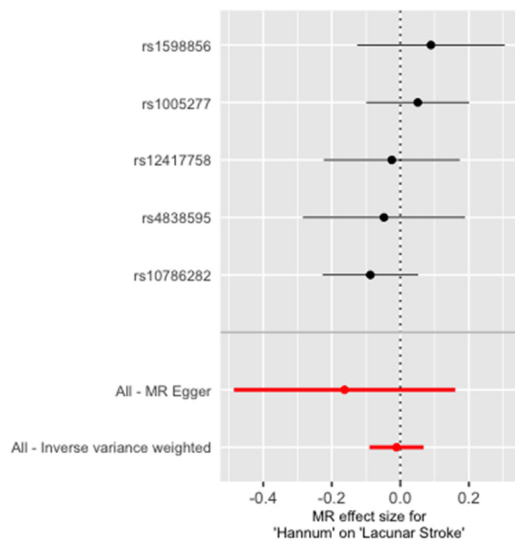

(b) Leave-one-out analysis

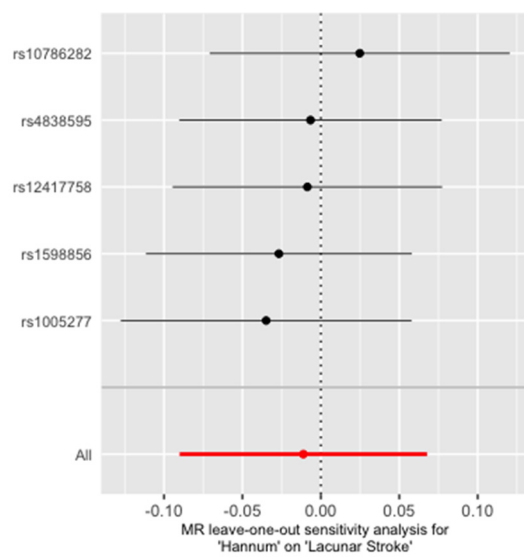

Supplement 2 Figure 35. The single SNP analysis and leave-one-out analysis for HannumAge on all location BMB

(a) Forest plot of single SNP MR

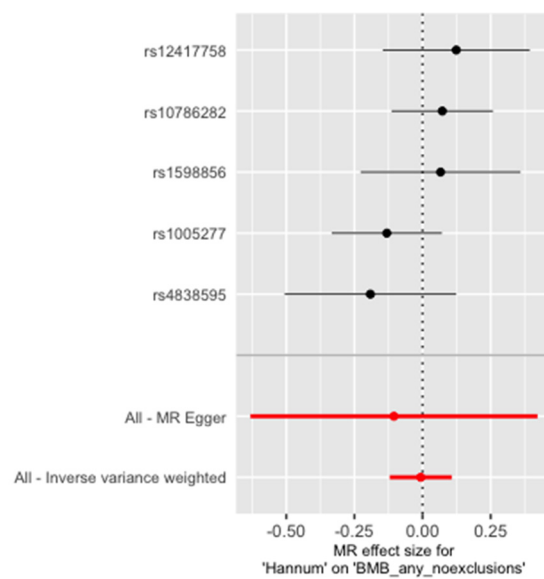

(b) Leave-one-out analysis

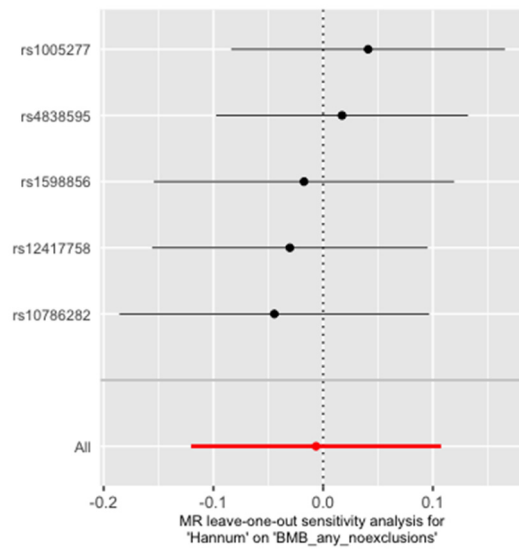

Supplement 2 Figure 36. The single SNP analysis and leave-one-out analysis for HannumAge on lobar BMB

(a) Forest plot of single SNP MR

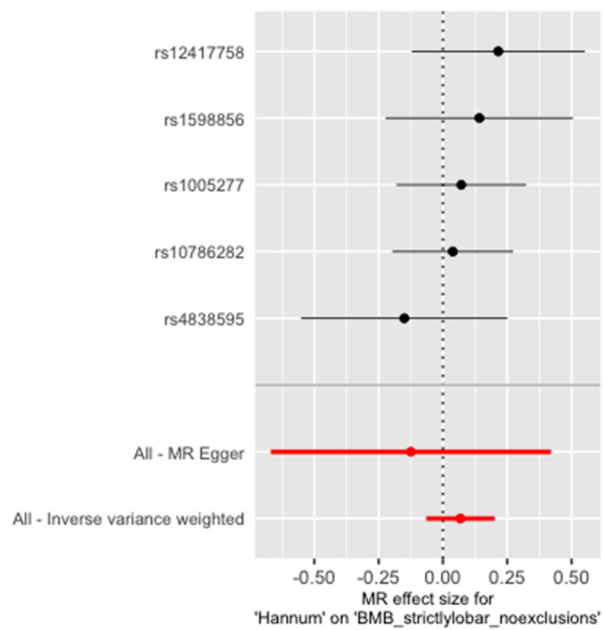

(b) Leave-one-out analysis

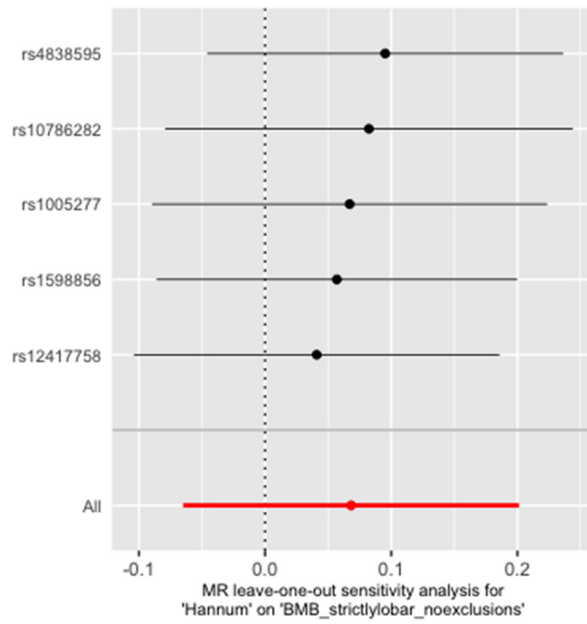

Supplement 2 Figure 37. The single SNP analysis and leave-one-out analysis for HannumAge on mixed or deep BMB

(a) Forest plot of single SNP MR

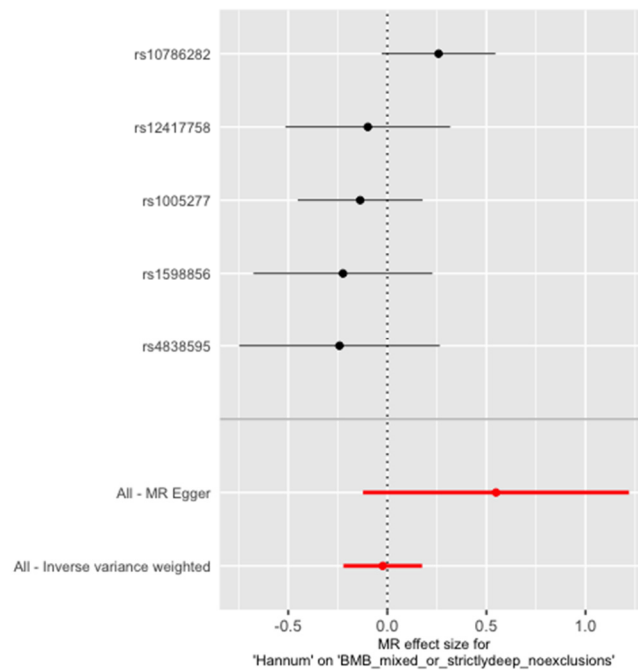

(b) Leave-one-out analysis

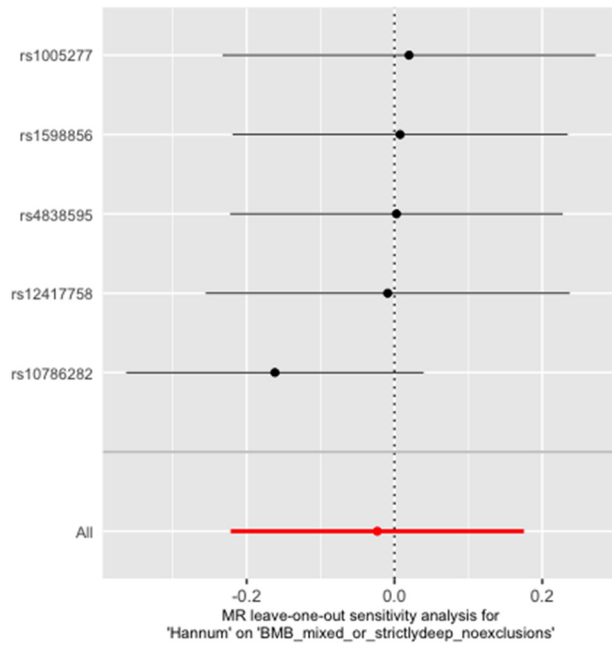

Supplement 2 Figure 38. The single SNP analysis and leave-one-out analysis for HannumAge on all location ICH or SVS

(a) Forest plot of single SNP MR

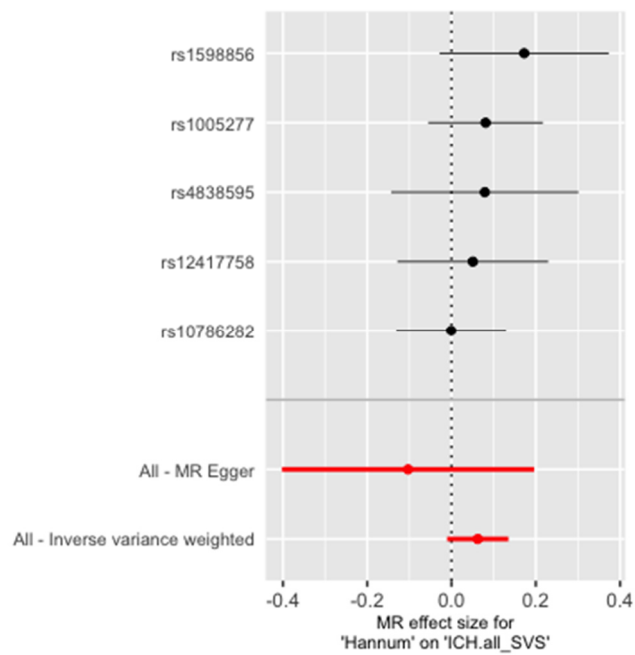

(b) Leave-one-out analysis

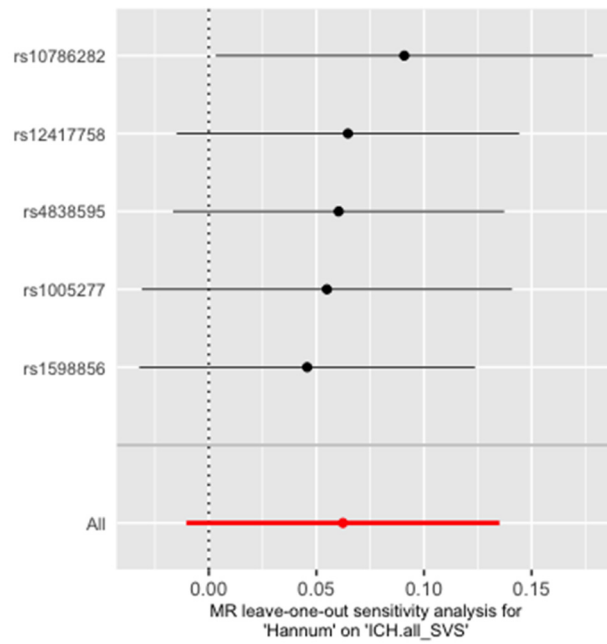

Supplement 2 Figure 39. The single SNP analysis and leave-one-out analysis for HannumAge on lobar ICH or SVS

(a) Forest plot of single SNP MR

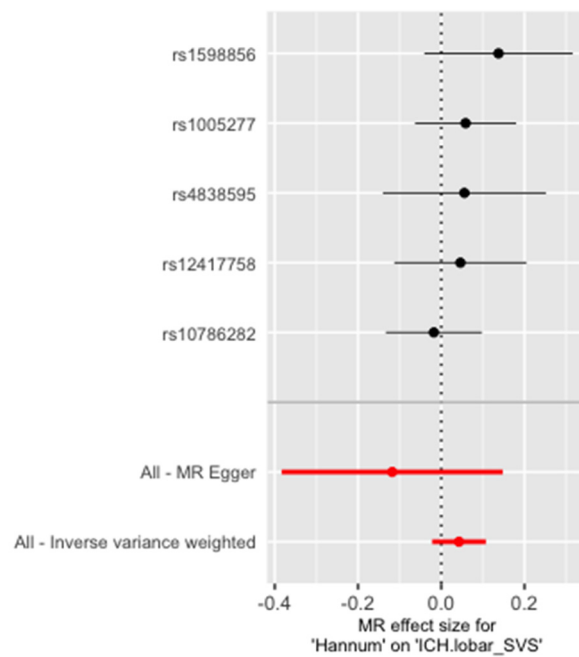

(b) Leave-one-out analysis

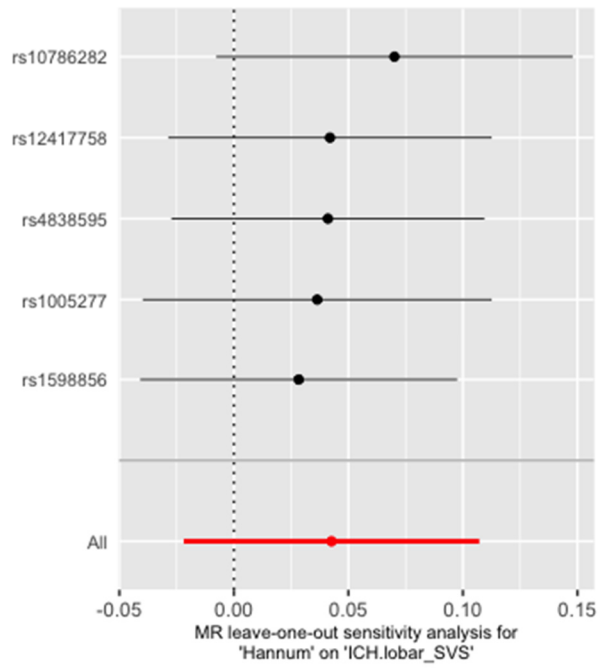

Supplement 2 Figure 40. The single SNP analysis and leave-one-out analysis for HannumAge on non-lobar ICH or SVS

(a) Forest plot of single SNP MR

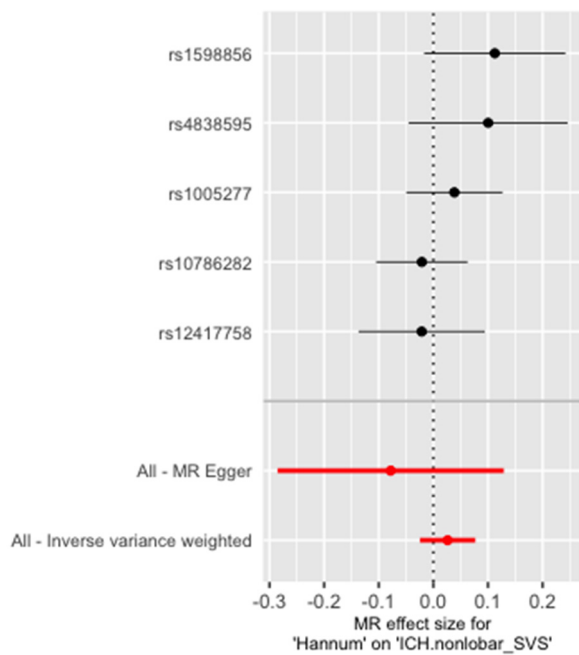

(b) Leave-one-out analysis

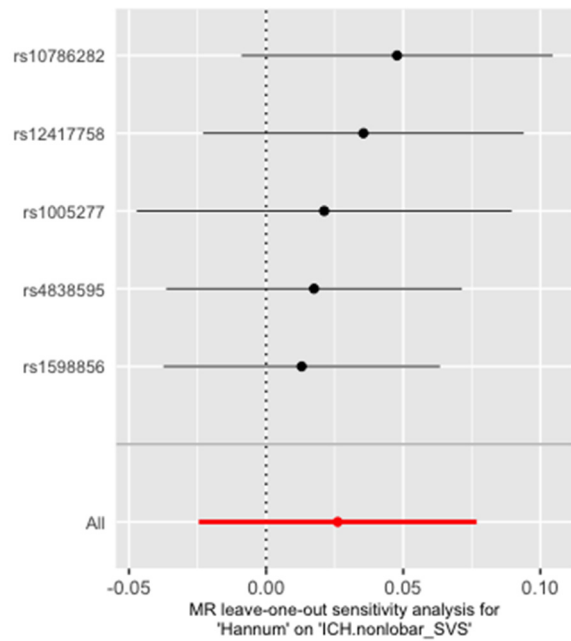

Supplement 2 Figure 41. The single SNP analysis and leave-one-out analysis for Intrinsic HorvathAge acceleration on WMH volume

(a) Forest plot of single SNP MR

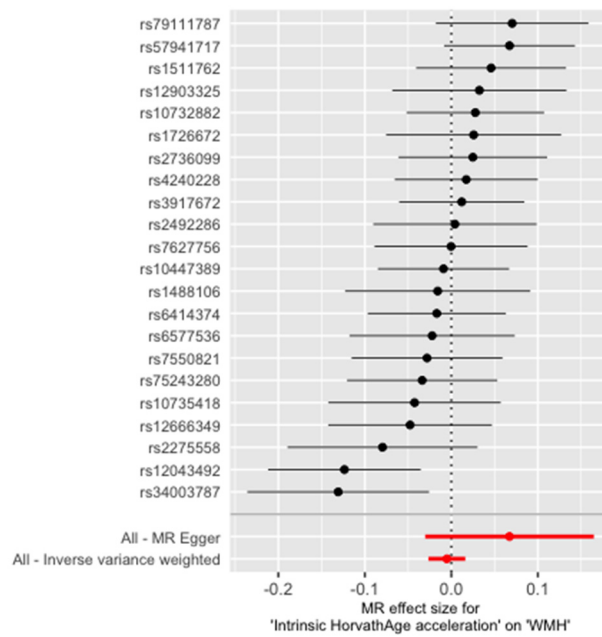

(b) Leave-one-out analysis



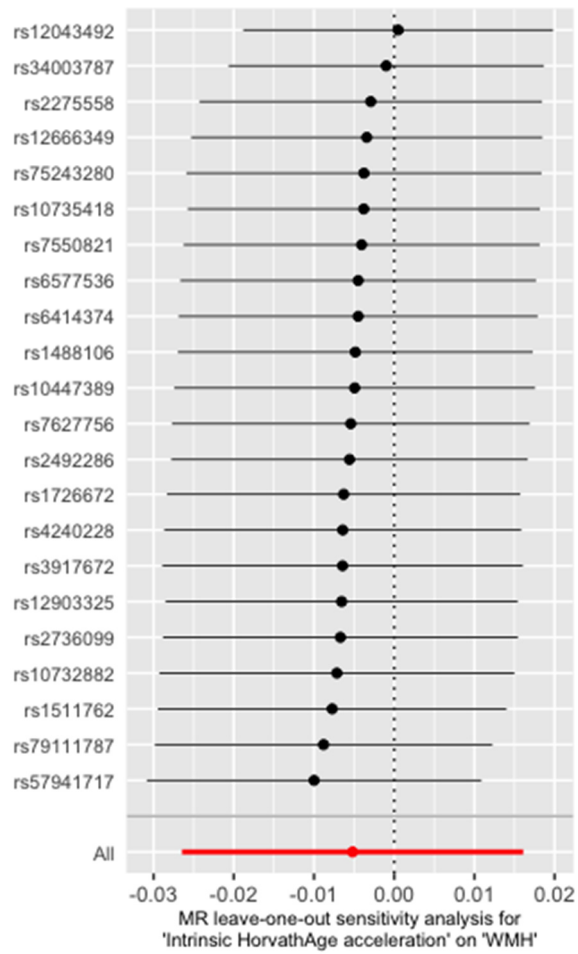

Supplement 2 Figure 42. The single SNP analysis and leave-one-out analysis for Intrinsic HorvathAge acceleration on FA

(a) Forest plot of single SNP MR

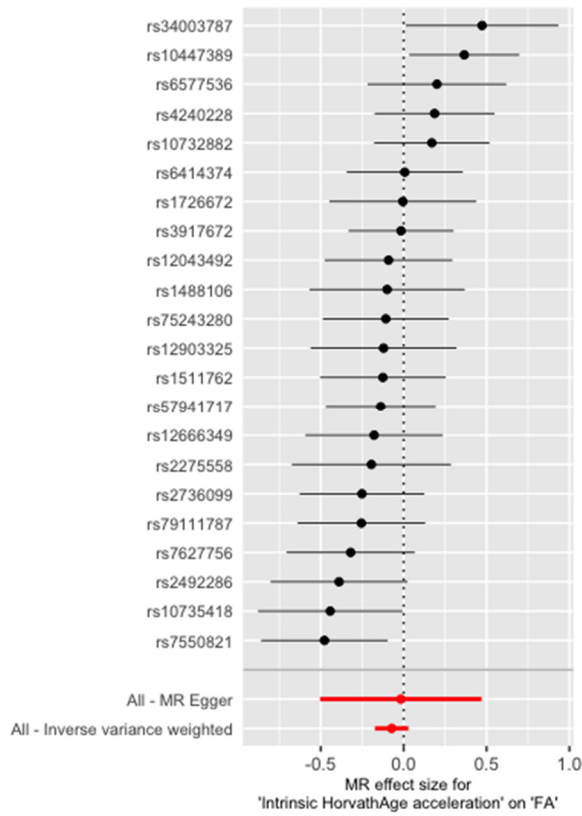

(b) Leave-one-out analysis

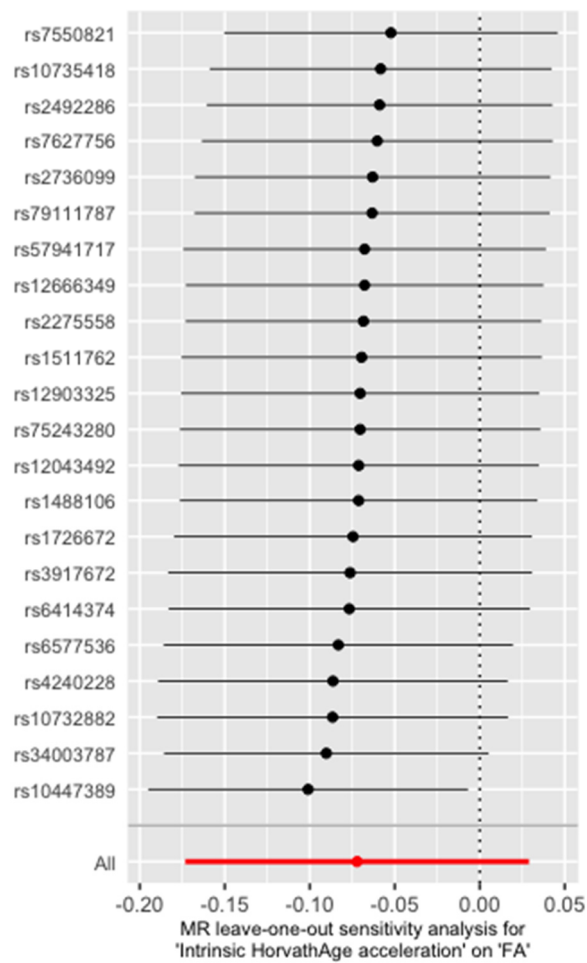

Supplement 2 Figure 43. The single SNP analysis and leave-one-out analysis for Intrinsic HorvathAge acceleration on MD

(a) Forest plot of single SNP MR

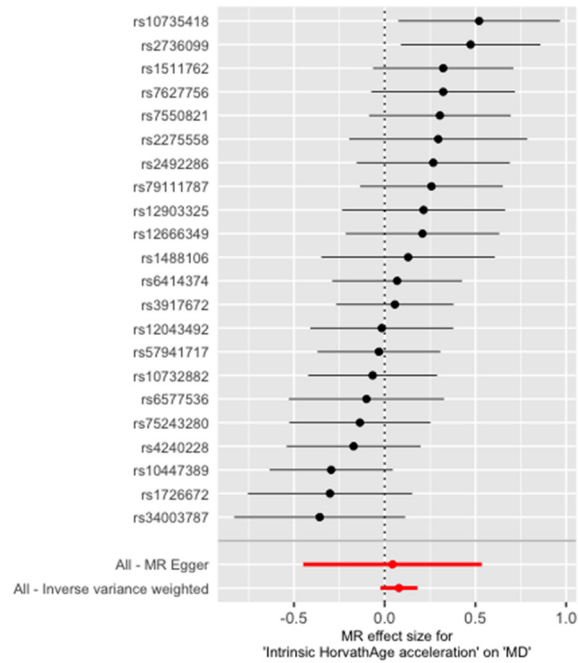

(b) Leave-one-out analysis

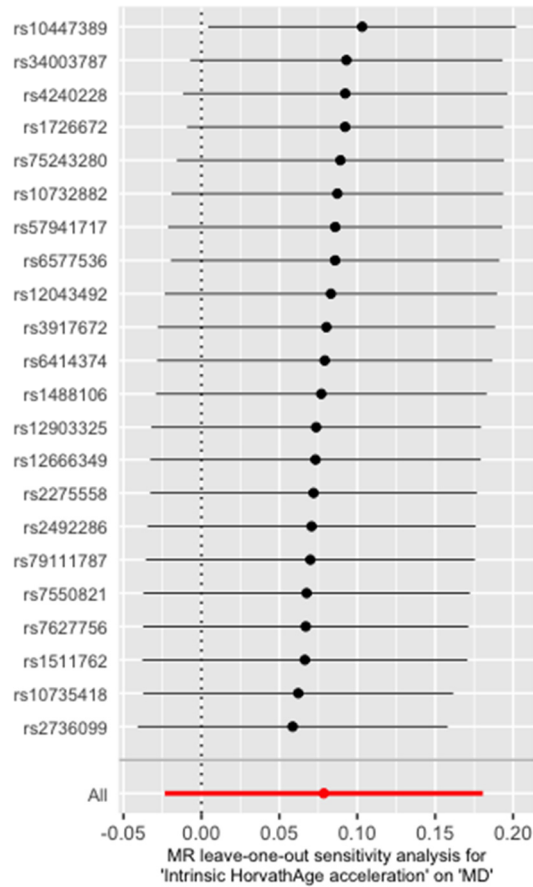

Supplement 2 Figure 44. The single SNP analysis and leave-one-out analysis for Intrinsic HorvathAge acceleration on lacunar stroke

(a) Forest plot of single SNP MR

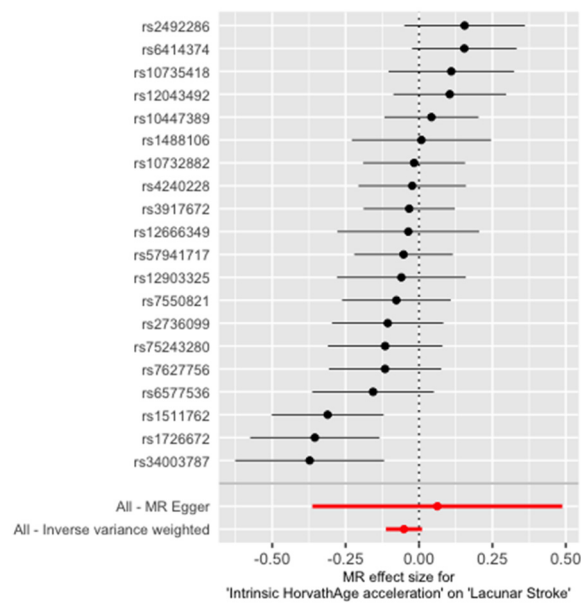

(b) Leave-one-out analysis

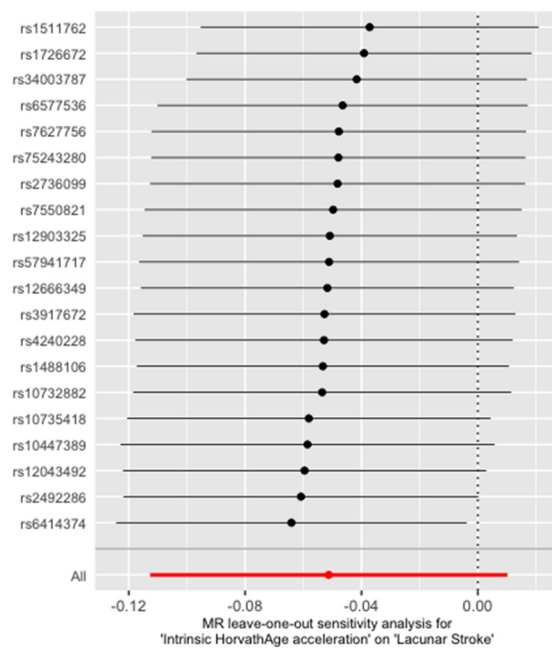

Supplement 2 Figure 45. The single SNP analysis and leave-one-out analysis for Intrinsic HorvathAge acceleration on all location BMB

(a) Forest plot of single SNP MR

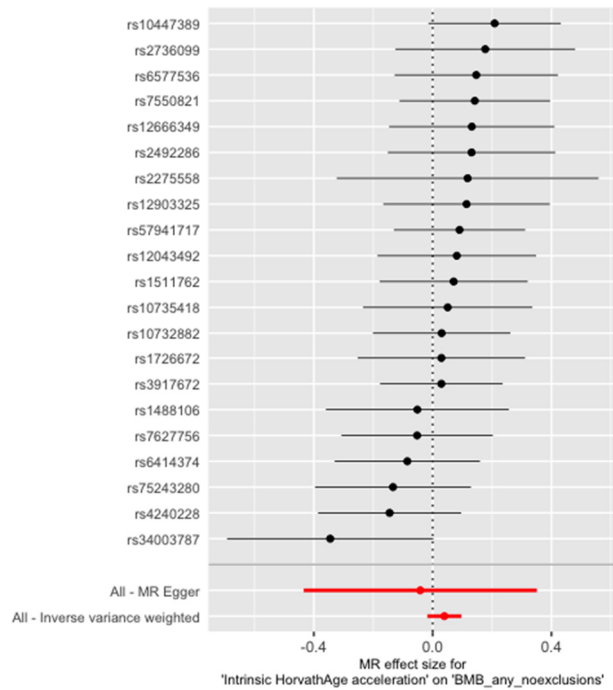

## (b) Leave-one-out analysis

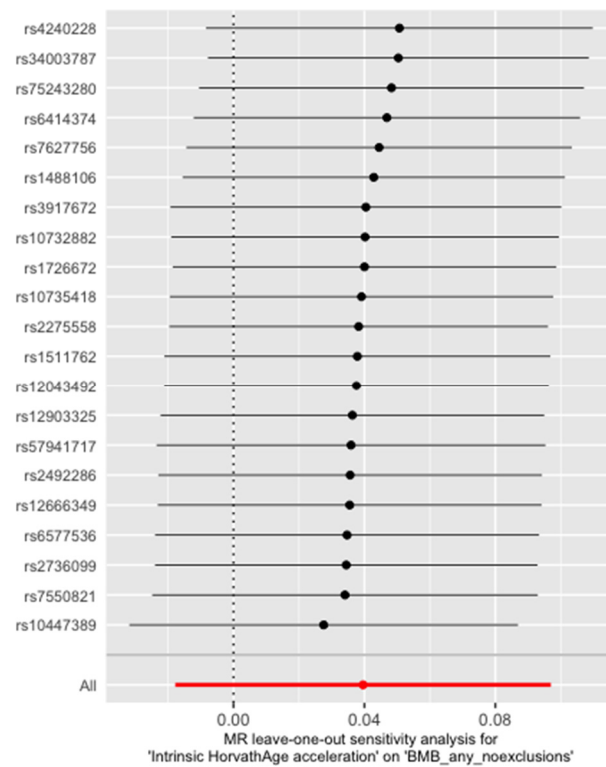

Supplement 2 Figure 46. The single SNP analysis and leave-one-out analysis for Intrinsic HorvathAge acceleration on lobar BMB

## (a) Forest plot of single SNP MR

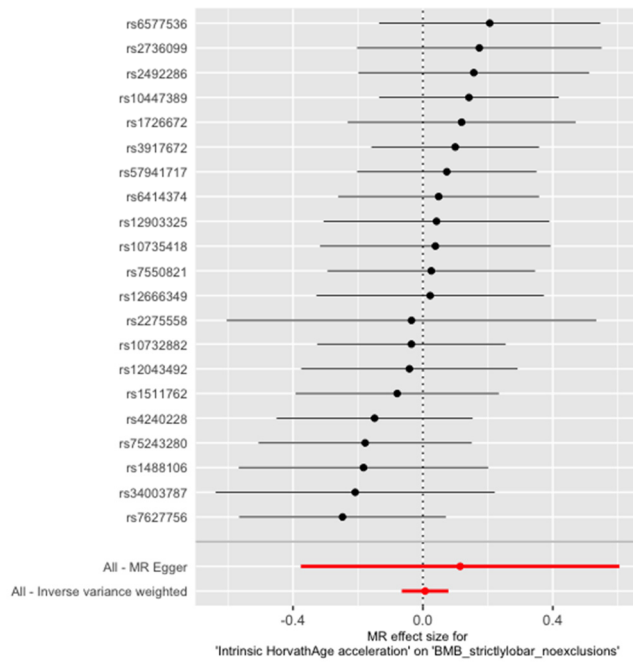

(b) Leave-one-out analysis

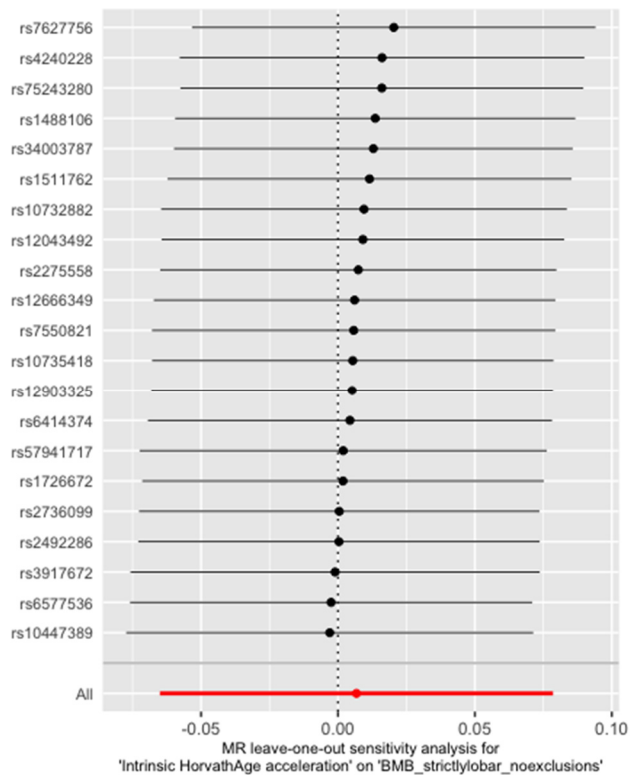

Supplement 2 Figure 47. The single SNP analysis and leave-one-out analysis for Intrinsic HorvathAge acceleration on mixed or deep BMB

(a) Forest plot of single SNP MR

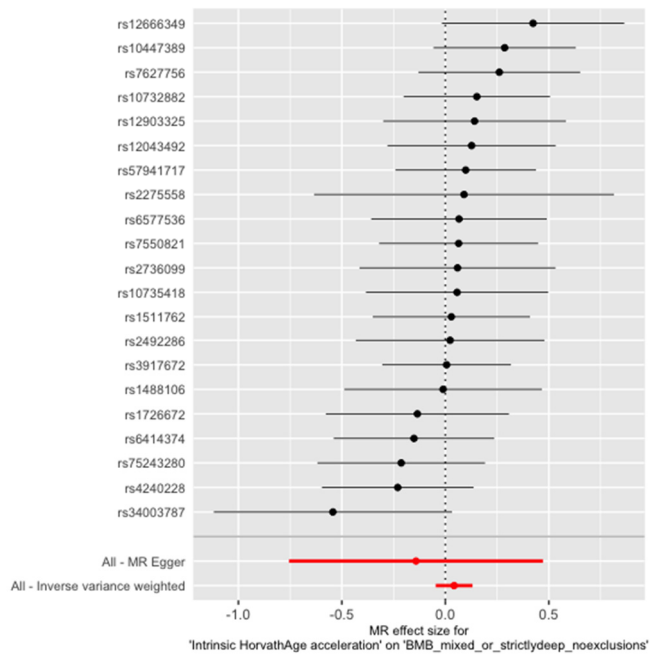

### (b) Leave-one-out analysis

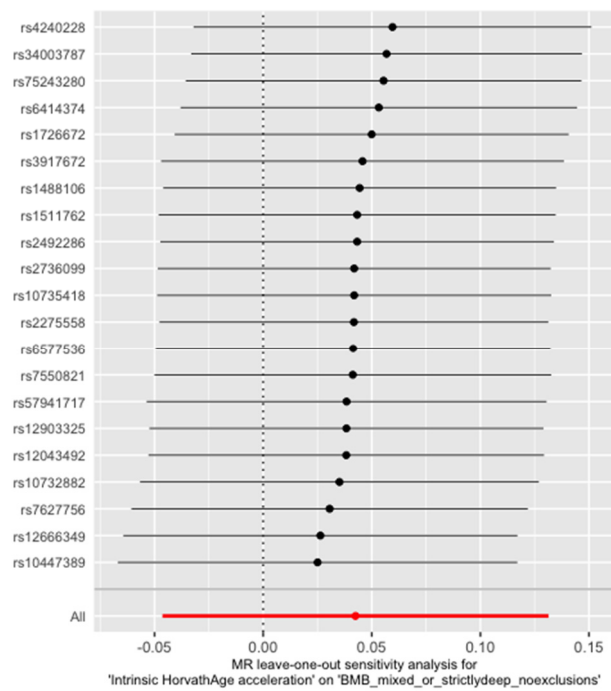

Supplement 2 Figure 48. The single SNP analysis and leave-one-out analysis for Intrinsic HorvathAge acceleration on all location ICH or SVS

### (a) Forest plot of single SNP MR

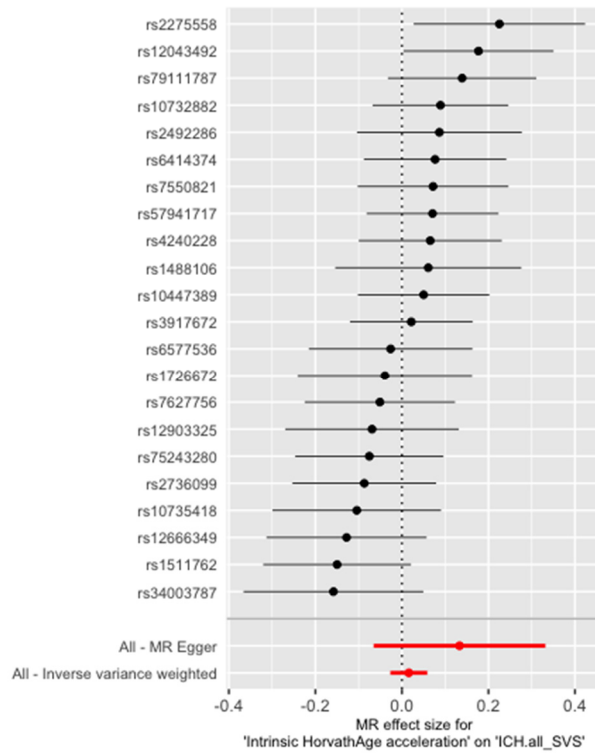

(b) Leave-one-out analysis

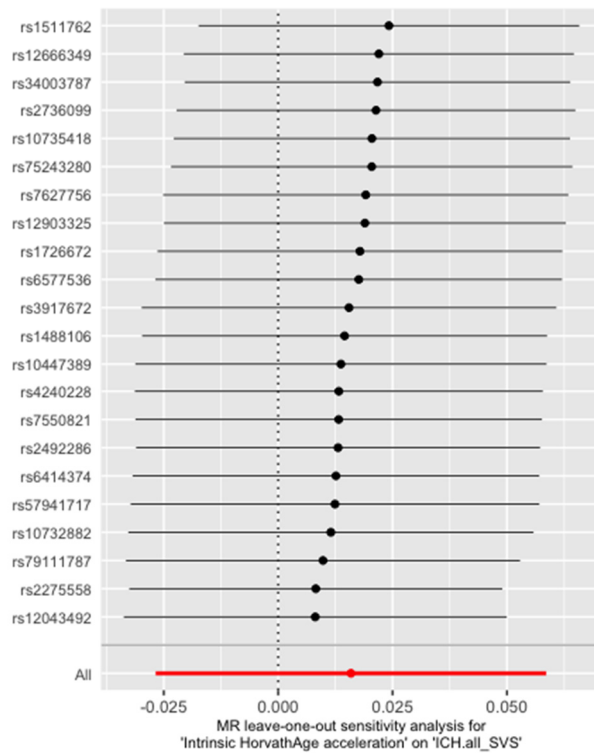

Supplement 2 Figure 49. The single SNP analysis and leave-one-out analysis for Intrinsic HorvathAge acceleration on lobar ICH or SVS

(a) Forest plot of single SNP MR



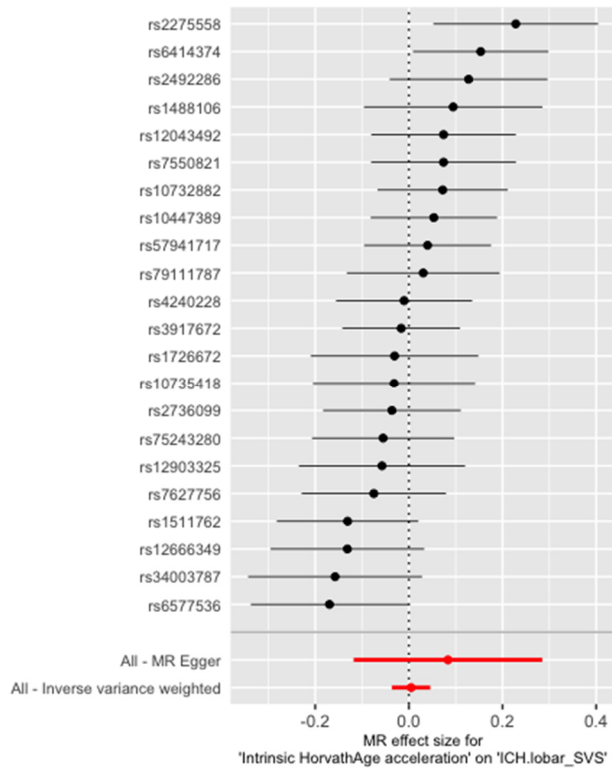

(b) Leave-one-out analysis

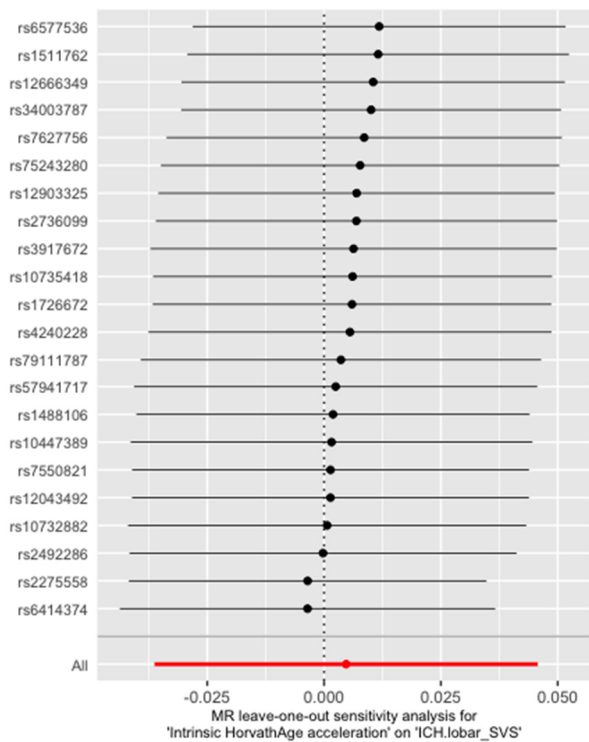

Supplement 2 Figure 50. The single SNP analysis and leave-one-out analysis for Intrinsic HorvathAge acceleration on non-lobar ICH or SVS

(a) Forest plot of single SNP MR

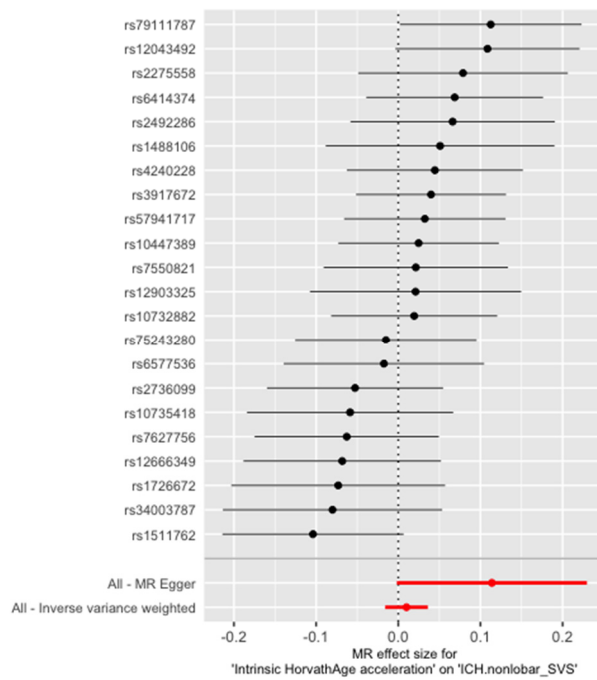

### (b) Leave-one-out analysis

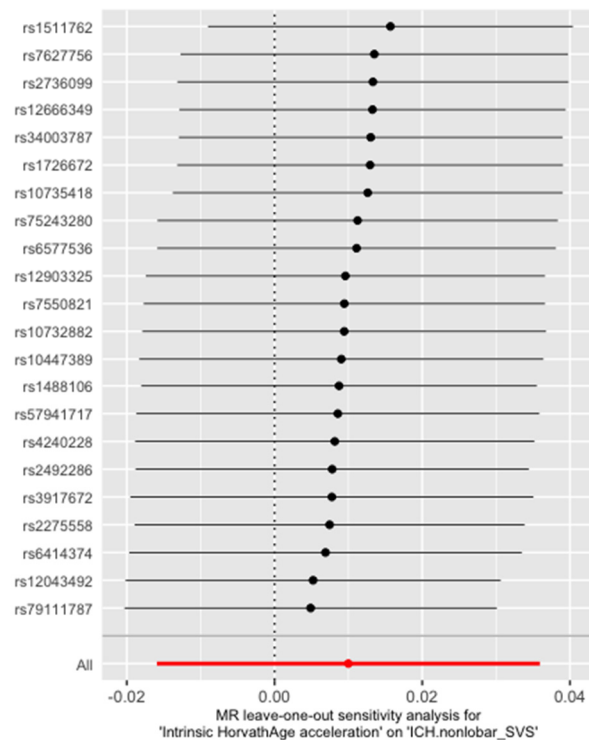

## Supplement 3. Results of other four MR methods for causal effect of exposures on outcomes

Supplement 3 Table 1. Results of other four MR methods for causal effect of LTL on CSVD

| TL on CSVD | No.of<br>SNPs | Method | OR | [95%CI] | P |
|------------|---------------|--------|----|---------|---|
|------------|---------------|--------|----|---------|---|

|                            |     |                 |      |              |      |
|----------------------------|-----|-----------------|------|--------------|------|
| WMH volume                 | 119 | MR Egger        | 1.07 | [0.93, 1.24] | 0.32 |
|                            |     | Weighted median | 1.00 | [0.88, 1.15] | 0.94 |
|                            |     | Simple mode     | 1.07 | [0.80, 1.44] | 0.64 |
|                            |     | Weighted mode   | 1.01 | [0.84, 1.20] | 0.95 |
| FA                         | 119 | MR Egger        | 0.41 | [0.21, 0.81] | 0.01 |
|                            |     | Weighted median | 0.76 | [0.43, 1.36] | 0.36 |
|                            |     | Simple mode     | 0.77 | [0.26, 2.24] | 0.63 |
|                            |     | Weighted mode   | 0.70 | [0.37, 1.34] | 0.29 |
| MD                         | 118 | MR Egger        | 1.57 | [0.79, 3.11] | 0.20 |
|                            |     | Weighted median | 1.64 | [0.91, 2.95] | 0.10 |
|                            |     | Simple mode     | 1.61 | [0.51, 5.14] | 0.42 |
|                            |     | Weighted mode   | 1.61 | [0.82, 3.16] | 0.17 |
| lacunar stroke             | 98  | MR Egger        | 0.76 | [0.50, 1.14] | 0.19 |
|                            |     | Weighted median | 0.99 | [0.74, 1.33] | 0.96 |
|                            |     | Simple mode     | 0.80 | [0.46, 1.37] | 0.41 |
|                            |     | Weighted mode   | 0.98 | [0.69, 1.39] | 0.92 |
| all location<br>BMB        | 94  | MR Egger        | 0.82 | [0.48, 1.40] | 0.46 |
|                            |     | Weighted median | 1.01 | [0.66, 1.55] | 0.97 |
|                            |     | Simple mode     | 1.06 | [0.48, 2.32] | 0.89 |
|                            |     | Weighted mode   | 1.03 | [0.64, 1.65] | 0.91 |
| lobar BMB                  | 94  | MR Egger        | 0.97 | [0.49, 1.92] | 0.94 |
|                            |     | Weighted median | 0.91 | [0.54, 1.53] | 0.72 |
|                            |     | Simple mode     | 1.04 | [0.38, 2.79] | 0.95 |
|                            |     | Weighted mode   | 0.88 | [0.50, 1.56] | 0.66 |
| mixed or deep<br>BMB       | 89  | MR Egger        | 0.69 | [0.27, 1.72] | 0.42 |
|                            |     | Weighted median | 1.36 | [0.67, 2.77] | 0.40 |
|                            |     | Simple mode     | 1.89 | [0.52, 6.87] | 0.34 |
|                            |     | Weighted mode   | 1.53 | [0.68, 3.44] | 0.31 |
| all location<br>ICH or SVS | 98  | MR Egger        | 0.92 | [0.65, 1.31] | 0.66 |
|                            |     | Weighted median | 1.09 | [0.83, 1.44] | 0.53 |
|                            |     | Simple mode     | 1.12 | [0.62, 2.01] | 0.70 |
|                            |     | Weighted mode   | 1.14 | [0.76, 1.72] | 0.52 |
| lobar ICH or<br>SVS        | 101 | MR Egger        | 0.96 | [0.73, 1.27] | 0.77 |
|                            |     | Weighted median | 1.04 | [0.81, 1.35] | 0.74 |
|                            |     | Simple mode     | 1.42 | [0.84, 2.39] | 0.20 |
|                            |     | Weighted mode   | 1.11 | [0.81, 1.52] | 0.52 |
| non-lobar ICH<br>or SVS    | 97  | MR Egger        | 0.95 | [0.76, 1.18] | 0.62 |
|                            |     | Weighted median | 1.04 | [0.85, 1.26] | 0.72 |
|                            |     | Simple mode     | 1.19 | [0.79, 1.79] | 0.42 |

|  |  |               |      |              |      |
|--|--|---------------|------|--------------|------|
|  |  | Weighted mode | 1.07 | [0.81, 1.40] | 0.63 |
|--|--|---------------|------|--------------|------|

Supplement 3 Table 2. Results of other four MR methods for causal effect of GrimAge on CSVD

| GrimAge<br>on CSVD         | No.of<br>SNPs | Method          | OR   | [95%CI]           | P    |
|----------------------------|---------------|-----------------|------|-------------------|------|
| WMH volume                 | 4             | MR Egger        | 4.41 | [1.84, 10.57]     | 0.08 |
|                            |               | Weighted median | 1.00 | [0.92, 1.08]      | 0.98 |
|                            |               | Simple mode     | 0.98 | [0.85, 1.13]      | 0.81 |
|                            |               | Weighted mode   | 1.00 | [0.87, 1.15]      | 0.99 |
| FA                         | 4             | MR Egger        | 0.01 | [0.00, 1.14]      | 0.20 |
|                            |               | Weighted median | 1.12 | [0.83, 1.53]      | 0.45 |
|                            |               | Simple mode     | 1.21 | [0.69, 2.11]      | 0.55 |
|                            |               | Weighted mode   | 1.20 | [0.68, 2.11]      | 0.57 |
| MD                         | 4             | MR Egger        | 9.12 | [0.18, 455.84]    | 0.38 |
|                            |               | Weighted median | 1.01 | [0.76, 1.36]      | 0.93 |
|                            |               | Simple mode     | 1.12 | [0.72, 1.73]      | 0.65 |
|                            |               | Weighted mode   | 1.12 | [0.75, 1.66]      | 0.63 |
| lacunar stroke             | 4             | MR Egger        | 0.42 | [0.07, 2.64]      | 0.45 |
|                            |               | Weighted median | 0.97 | [0.85, 1.10]      | 0.62 |
|                            |               | Simple mode     | 0.98 | [0.82, 1.18]      | 0.84 |
|                            |               | Weighted mode   | 0.98 | [0.80, 1.19]      | 0.84 |
| all location<br>BMB        | 3             | MR Egger        | 0.24 | [0.00, 142.24]    | 0.74 |
|                            |               | Weighted median | 1.06 | [0.82, 1.37]      | 0.65 |
|                            |               | Simple mode     | 1.02 | [0.70, 1.48]      | 0.94 |
|                            |               | Weighted mode   | 1.05 | [0.75, 1.45]      | 0.81 |
| lobar BMB                  | 3             | MR Egger        | 0.04 | [8.86E-6, 198.45] | 0.60 |
|                            |               | Weighted median | 0.99 | [7.23E-1, 1.35]   | 0.95 |
|                            |               | Simple mode     | 0.89 | [6.02E-1, 1.31]   | 0.61 |
|                            |               | Weighted mode   | 0.92 | [6.50E-1, 1.31]   | 0.70 |
| mixed or deep<br>BMB       | 3             | MR Egger        | 2.94 | [0.01, 679.25]    | 0.76 |
|                            |               | Weighted median | 1.14 | [0.82, 1.60]      | 0.42 |
|                            |               | Simple mode     | 1.17 | [0.79, 1.74]      | 0.52 |
|                            |               | Weighted mode   | 1.18 | [0.79, 1.75]      | 0.50 |
| all location<br>ICH or SVS | 3             | MR Egger        | 0.07 | [0.01, 0.46]      | 0.22 |
|                            |               | Weighted median | 0.94 | [0.78, 1.13]      | 0.50 |
|                            |               | Simple mode     | 0.95 | [0.71, 1.28]      | 0.78 |
|                            |               | Weighted mode   | 0.89 | [0.67, 1.20]      | 0.53 |
| lobar ICH or<br>SVS        | 3             | MR Egger        | 0.06 | [0.01, 0.31]      | 0.19 |

|                         |   |                 |      |              |      |
|-------------------------|---|-----------------|------|--------------|------|
| non-lobar ICH<br>or SVS | 3 | Weighted median | 1.02 | [0.87, 1.20] | 0.79 |
|                         |   | Simple mode     | 1.12 | [0.88, 1.41] | 0.46 |
|                         |   | Weighted mode   | 1.11 | [0.85, 1.45] | 0.52 |
|                         |   | MR Egger        | 0.36 | [0.11, 1.20] | 0.34 |
|                         |   | Weighted median | 0.96 | [0.87, 1.06] | 0.44 |
|                         |   | Simple mode     | 0.98 | [0.85, 1.13] | 0.79 |
|                         |   | Weighted mode   | 0.94 | [0.82, 1.08] | 0.48 |

Supplement 3 Table 3. Results of other four MR methods for causal effect of PhenoAge on CSVD.

| PhenoAge on<br>CSVD  | No.of<br>SNPs | Method          | OR   | [95%CI]      | P    |
|----------------------|---------------|-----------------|------|--------------|------|
| WMH volume           | 9             | MR Egger        | 1.02 | [0.93, 1.11] | 0.69 |
|                      |               | Weighted median | 1.02 | [0.99, 1.06] | 0.15 |
|                      |               | Simple mode     | 1.03 | [0.98, 1.08] | 0.31 |
|                      |               | Weighted mode   | 1.03 | [0.98, 1.08] | 0.25 |
| FA                   | 9             | MR Egger        | 0.98 | [0.67, 1.44] | 0.92 |
|                      |               | Weighted median | 1.01 | [0.89, 1.16] | 0.84 |
|                      |               | Simple mode     | 1.06 | [0.85, 1.31] | 0.64 |
|                      |               | Weighted mode   | 1.02 | [0.83, 1.25] | 0.86 |
| MD                   | 9             | MR Egger        | 1.05 | [0.71, 1.55] | 0.82 |
|                      |               | Weighted median | 0.88 | [0.77, 1.01] | 0.08 |
|                      |               | Simple mode     | 0.87 | [0.68, 1.09] | 0.26 |
|                      |               | Weighted mode   | 0.87 | [0.71, 1.07] | 0.23 |
| lacunar stroke       | 7             | MR Egger        | 0.91 | [0.74, 1.05] | 0.39 |
|                      |               | Weighted median | 0.97 | [0.90, 1.05] | 0.48 |
|                      |               | Simple mode     | 0.96 | [0.87, 1.07] | 0.52 |
|                      |               | Weighted mode   | 0.96 | [0.87, 1.07] | 0.48 |
| all location<br>BMB  | 9             | MR Egger        | 1.04 | [0.77, 1.40] | 0.80 |
|                      |               | Weighted median | 0.95 | [0.86, 1.04] | 0.26 |
|                      |               | Simple mode     | 0.93 | [0.81, 1.06] | 0.29 |
|                      |               | Weighted mode   | 0.93 | [0.82, 1.05] | 0.27 |
| lobar BMB            | 9             | MR Egger        | 1.09 | [0.78, 1.52] | 0.64 |
|                      |               | Weighted median | 0.98 | [0.87, 1.10] | 0.70 |
|                      |               | Simple mode     | 0.99 | [0.83, 1.19] | 0.94 |
|                      |               | Weighted mode   | 0.93 | [0.79, 1.10] | 0.43 |
| mixed or deep<br>BMB | 9             | MR Egger        | 0.93 | [0.59, 1.44] | 0.75 |
|                      |               | Weighted median | 0.90 | [0.78, 1.03] | 0.13 |
|                      |               | Simple mode     | 0.85 | [0.69, 1.06] | 0.18 |
|                      |               | Weighted mode   | 0.87 | [0.72, 1.06] | 0.20 |

|                            |   |                 |      |              |      |
|----------------------------|---|-----------------|------|--------------|------|
| all location<br>ICH or SVS | 9 | MR Egger        | 0.98 | [0.82, 1.17] | 0.80 |
|                            |   | Weighted median | 0.98 | [0.92, 1.03] | 0.40 |
|                            |   | Simple mode     | 0.96 | [0.87, 1.06] | 0.49 |
|                            |   | Weighted mode   | 0.96 | [0.88, 1.05] | 0.38 |
| lobar ICH or<br>SVS        | 9 | MR Egger        | 1.04 | [0.89, 1.22] | 0.62 |
|                            |   | Weighted median | 0.98 | [0.93, 1.04] | 0.51 |
|                            |   | Simple mode     | 0.98 | [0.90, 1.06] | 0.58 |
|                            |   | Weighted mode   | 0.98 | [0.90, 1.06] | 0.57 |
| non-lobar ICH<br>or SVS    | 9 | MR Egger        | 0.93 | [0.81, 1.07] | 0.36 |
|                            |   | Weighted median | 0.97 | [0.93, 1.01] | 0.19 |
|                            |   | Simple mode     | 0.97 | [0.91, 1.03] | 0.38 |
|                            |   | Weighted mode   | 0.97 | [0.91, 1.02] | 0.29 |

Supplement 3 Table 4. Results of other four MR methods for causal effect of HannumAge on CSVD

| HannumAge<br>on CSVD | No.of<br>SNPs | Method          | OR   | [95%CI]      | P    |
|----------------------|---------------|-----------------|------|--------------|------|
| WMH volume           | 5             | MR Egger        | 0.90 | [0.78, 1.05] | 0.28 |
|                      |               | Weighted median | 0.97 | [0.92, 1.01] | 0.13 |
|                      |               | Simple mode     | 0.96 | [0.90, 1.02] | 0.27 |
|                      |               | Weighted mode   | 0.96 | [0.91, 1.01] | 0.22 |
| FA                   | 5             | MR Egger        | 0.84 | [0.44, 1.62] | 0.64 |
|                      |               | Weighted median | 0.96 | [0.79, 1.17] | 0.71 |
|                      |               | Simple mode     | 0.98 | [0.75, 1.28] | 0.90 |
|                      |               | Weighted mode   | 0.94 | [0.73, 1.22] | 0.68 |
| MD                   | 5             | MR Egger        | 0.85 | [0.34, 2.13] | 0.75 |
|                      |               | Weighted median | 1.04 | [0.85, 1.28] | 0.70 |
|                      |               | Simple mode     | 0.98 | [0.76, 1.27] | 0.90 |
|                      |               | Weighted mode   | 0.99 | [0.78, 1.25] | 0.94 |
| lacunar stroke       | 5             | MR Egger        | 0.85 | [0.62, 1.17] | 0.40 |
|                      |               | Weighted median | 0.97 | [0.88, 1.08] | 0.60 |
|                      |               | Simple mode     | 0.96 | [0.83, 1.11] | 0.58 |
|                      |               | Weighted mode   | 0.94 | [0.81, 1.09] | 0.48 |
| all location<br>BMB  | 5             | MR Egger        | 0.90 | [0.53, 1.52] | 0.72 |
|                      |               | Weighted median | 1.07 | [0.94, 1.22] | 0.32 |
|                      |               | Simple mode     | 1.09 | [0.88, 1.34] | 0.47 |
|                      |               | Weighted mode   | 1.08 | [0.89, 1.32] | 0.46 |
| lobar BMB            | 5             | MR Egger        | 0.88 | [0.51, 1.52] | 0.68 |
|                      |               | Weighted median | 1.07 | [0.91, 1.25] | 0.44 |
|                      |               | Simple mode     | 1.10 | [0.89, 1.35] | 0.42 |

|                         |   |                 |      |              |      |
|-------------------------|---|-----------------|------|--------------|------|
| mixed or deep BMB       | 5 | Weighted mode   | 1.07 | [0.88, 1.30] | 0.53 |
|                         |   | MR Egger        | 1.73 | [0.88, 3.38] | 0.21 |
|                         |   | Weighted median | 0.89 | [0.71, 1.11] | 0.31 |
|                         |   | Simple mode     | 0.84 | [0.60, 1.16] | 0.35 |
| all location ICH or SVS | 5 | Weighted mode   | 0.86 | [0.58, 1.26] | 0.48 |
|                         |   | MR Egger        | 0.90 | [0.67, 1.22] | 0.55 |
|                         |   | Weighted median | 1.07 | [0.98, 1.18] | 0.12 |
|                         |   | Simple mode     | 1.07 | [0.95, 1.22] | 0.34 |
| lobar ICH or SVS        | 5 | Weighted mode   | 1.07 | [0.96, 1.21] | 0.29 |
|                         |   | MR Egger        | 0.89 | [0.68, 1.16] | 0.45 |
|                         |   | Weighted median | 1.05 | [0.97, 1.14] | 0.19 |
|                         |   | Simple mode     | 1.05 | [0.93, 1.19] | 0.44 |
| non-lobar ICH or SVS    | 5 | Weighted mode   | 1.06 | [0.95, 1.17] | 0.36 |
|                         |   | MR Egger        | 0.92 | [0.75, 1.14] | 0.51 |
|                         |   | Weighted median | 1.01 | [0.96, 1.07] | 0.66 |
|                         |   | Simple mode     | 1.00 | [0.91, 1.09] | 0.95 |
|                         |   | Weighted mode   | 1.00 | [0.92, 1.08] | 0.95 |

Supplement 3 Table 5. Results of other four MR methods for causal effect of Intrinsic HorvathAge acceleration on CSVD

| Intrinsic HorvathAge acceleration on CSVD | No.of SNPs | Method          | OR   | [95%CI]      | P    |
|-------------------------------------------|------------|-----------------|------|--------------|------|
| WMH volume                                | 22         | MR Egger        | 1.07 | [0.97, 1.18] | 0.19 |
|                                           |            | Weighted median | 1.00 | [0.97, 1.03] | 0.92 |
|                                           |            | Simple mode     | 1.00 | [0.95, 1.05] | 0.94 |
|                                           |            | Weighted mode   | 1.00 | [0.96, 1.05] | 0.85 |
| FA                                        | 22         | MR Egger        | 0.98 | [0.60, 1.60] | 0.95 |
|                                           |            | Weighted median | 0.90 | [0.79, 1.02] | 0.09 |
|                                           |            | Simple mode     | 0.88 | [0.69, 1.12] | 0.32 |
|                                           |            | Weighted mode   | 0.89 | [0.71, 1.12] | 0.34 |
| MD                                        | 22         | MR Egger        | 1.04 | [0.64, 1.71] | 0.87 |
|                                           |            | Weighted median | 1.06 | [0.93, 1.21] | 0.35 |
|                                           |            | Simple mode     | 1.28 | [0.96, 1.69] | 0.10 |
|                                           |            | Weighted mode   | 1.00 | [0.77, 1.30] | 0.99 |
| lacunar stroke                            | 20         | MR Egger        | 1.06 | [0.70, 1.63] | 0.78 |
|                                           |            | Weighted median | 0.97 | [0.91, 1.03] | 0.28 |
|                                           |            | Simple mode     | 0.95 | [0.85, 1.06] | 0.38 |

|                         |    |                 |      |              |      |
|-------------------------|----|-----------------|------|--------------|------|
| all location BMB        | 21 | Weighted mode   | 0.95 | [0.86, 1.06] | 0.37 |
|                         |    | MR Egger        | 0.96 | [0.65, 1.42] | 0.84 |
|                         |    | Weighted median | 1.06 | [0.98, 1.15] | 0.12 |
|                         |    | Simple mode     | 1.11 | [0.97, 1.28] | 0.16 |
| lobar BMB               | 21 | Weighted mode   | 1.09 | [0.94, 1.26] | 0.26 |
|                         |    | MR Egger        | 1.12 | [0.69, 1.83] | 0.65 |
|                         |    | Weighted median | 1.04 | [0.94, 1.14] | 0.46 |
|                         |    | Simple mode     | 1.05 | [0.87, 1.26] | 0.61 |
| mixed or deep BMB       | 21 | Weighted mode   | 1.06 | [0.90, 1.26] | 0.48 |
|                         |    | MR Egger        | 0.87 | [0.47, 1.60] | 0.66 |
|                         |    | Weighted median | 1.06 | [0.94, 1.20] | 0.33 |
|                         |    | Simple mode     | 1.07 | [0.86, 1.33] | 0.58 |
| all location ICH or SVS | 22 | Weighted mode   | 1.06 | [0.85, 1.33] | 0.60 |
|                         |    | MR Egger        | 1.14 | [0.94, 1.39] | 0.20 |
|                         |    | Weighted median | 1.05 | [0.99, 1.10] | 0.09 |
|                         |    | Simple mode     | 1.07 | [0.96, 1.19] | 0.25 |
| lobar ICH or SVS        | 22 | Weighted mode   | 1.07 | [0.96, 1.18] | 0.23 |
|                         |    | MR Egger        | 1.09 | [0.89, 1.33] | 0.43 |
|                         |    | Weighted median | 0.99 | [0.94, 1.04] | 0.67 |
|                         |    | Simple mode     | 0.99 | [0.89, 1.09] | 0.80 |
| non-lobar ICH or SVS    | 22 | Weighted mode   | 1.00 | [0.92, 1.09] | 0.95 |
|                         |    | MR Egger        | 1.12 | [1.00, 1.26] | 0.07 |
|                         |    | Weighted median | 1.02 | [0.99, 1.06] | 0.21 |
|                         |    | Simple mode     | 1.04 | [0.97, 1.11] | 0.31 |
|                         |    | Weighted mode   | 1.04 | [0.97, 1.10] | 0.27 |

#### Supplement 4. Results of sensitivity analysis

Supplement 4 Table 1. Results of sensitivity analysis of LTL on CSVD

| LTL on CSVD    | Heterogeneity test<br>(Cochran's Q) |        | Pleiotropy test | MR PRESSO      |         | F     |
|----------------|-------------------------------------|--------|-----------------|----------------|---------|-------|
|                | P (MR Egger)                        | P(IVW) | P (MR Egger)    | P(Global test) | Outlier |       |
| WMH volume     | 0.40                                | 0.41   | 0.58            | 0.18           | NA      | 36.87 |
| FA             | 0.06                                | 0.03   | 0.02            | 0.09           | NA      | 36.87 |
| MD             | 0.22                                | 0.24   | 0.58            | 0.28           | NA      | 35.62 |
| lacunar stroke | 0.003                               | 0.002  | 0.08            | 0.003          | 3       | 39.06 |
| all location   | 0.25                                | 0.22   | 0.16            | 0.18           | NA      | 44.21 |



|                            |      |       |      |       |    |       |
|----------------------------|------|-------|------|-------|----|-------|
| BMB                        |      |       |      |       |    |       |
| lobar BMB                  | 0.26 | 0.29  | 0.83 | 0.27  | NA | 44.21 |
| mixed or<br>deep BMB       | 0.07 | 0.048 | 0.09 | 0.04  | NA | 46.31 |
| all location<br>ICH or SVS | 0.01 | 0.01  | 0.89 | 0.008 | NA | 38.06 |
| lobar ICH or<br>SVS        | 0.19 | 0.21  | 0.99 | 0.17  | NA | 37.23 |
| non-lobar<br>ICH or SVS    | 0.03 | 0.04  | 0.68 | 0.02  | NA | 38.44 |

Supplement 4 Table 2. Results of sensitivity analysis of GrimAge on CSVD

| GrimAge<br>on CSVD         | Heterogeneity test<br>(Cochran's Q) |         | Pleiotropy test |                    | MR PRESSO |  | F     |
|----------------------------|-------------------------------------|---------|-----------------|--------------------|-----------|--|-------|
|                            | P (MR Egger)                        | P (IVW) | P (MR Egger)    | P (Global<br>test) | Outlier   |  |       |
| WMH<br>volume              | 0.59                                | 0.01    | 0.08            | 0.04               | 2         |  | 17.58 |
| FA                         | 0.27                                | 0.05    | 0.19            | 0.11               | NA        |  | 17.58 |
| MD                         | 0.45                                | 0.41    | 0.38            | 0.48               | NA        |  | 17.58 |
| lacunar stroke             | 0.86                                | 0.79    | 0.48            | 0.78               | NA        |  | 17.58 |
| all location<br>BMB        | 0.02                                | 0.03    | 0.73            | -                  | -         |  | 17.34 |
| lobar BMB                  | 0.01                                | 0.01    | 0.58            | -                  | -         |  | 17.34 |
| mixed or<br>deep BMB       | 0.19                                | 0.38    | 0.77            | -                  | -         |  | 17.34 |
| all location<br>ICH or SVS | 0.71                                | 0.02    | 0.22            | -                  | -         |  | 17.34 |
| lobar ICH or<br>SVS        | 0.81                                | 0.003   | 0.87            | -                  | -         |  | 17.34 |
| non-lobar<br>ICH or SVS    | 0.87                                | 0.27    | 0.35            | -                  | -         |  | 17.34 |

- means MR PRESSO is not suitable to carry out

Supplement 4 Table 3. Results of sensitivity analysis of PhenoAge on CSVD

| PhenoAge<br>on CSVD | Heterogeneity test<br>(Cochran's Q) |         | Pleiotropy test |                    | MR PRESSO |  | F     |
|---------------------|-------------------------------------|---------|-----------------|--------------------|-----------|--|-------|
|                     | P (MR Egger)                        | P (IVW) | P (MR Egger)    | P (Global<br>test) | Outlier   |  |       |
| WMH<br>volume       | 0.45                                | 0.55    | 0.86            | 0.62               | NA        |  | 14.17 |
| FA                  | 0.89                                | 0.93    | 0.81            | 0.93               | NA        |  | 14.17 |

|                         |      |      |      |      |    |       |
|-------------------------|------|------|------|------|----|-------|
| MD                      | 0.81 | 0.85 | 0.57 | 0.87 | NA | 14.17 |
| lacunar stroke          | 0.36 | 0.37 | 0.39 | 0.46 | NA | 12.92 |
| all location BMB        | 0.24 | 0.31 | 0.63 | 0.45 | NA | 14.17 |
| lobar BMB               | 0.51 | 0.58 | 0.57 | 0.65 | NA | 14.17 |
| mixed or deep BMB       | 0.88 | 0.93 | 0.93 | 0.98 | NA | 14.17 |
| all location ICH or SVS | 0.64 | 0.73 | 0.93 | 0.67 | NA | 14.17 |
| lobar ICH or SVS        | 0.81 | 0.85 | 0.60 | 0.89 | NA | 14.17 |
| non-lobar ICH or SVS    | 0.18 | 0.20 | 0.45 | 0.17 | NA | 14.17 |

Supplement 4 Table 4. Results of sensitivity analysis of HannumAge on CSVD

| HannumAge<br>on CSVD    | Heterogeneity test<br>(Cochran's Q) |         | Pleiotropy test |                 | MR PRESSO |  | F     |
|-------------------------|-------------------------------------|---------|-----------------|-----------------|-----------|--|-------|
|                         | P (MR Egger)                        | P (IVW) | P (MR Egger)    | P (Global test) | Outlier   |  |       |
| WMH volume              | 0.67                                | 0.63    | 0.38            | 0.54            | NA        |  | 23.62 |
| FA                      | 0.46                                | 0.62    | 0.82            | 0.50            | NA        |  | 23.62 |
| MD                      | 0.13                                | 0.19    | 0.65            | 0.05            | NA        |  | 23.62 |
| lacunar stroke          | 0.60                                | 0.60    | 0.41            | 0.59            | NA        |  | 23.62 |
| all location BMB        | 0.22                                | 0.33    | 0.73            | 0.53            | NA        |  | 23.62 |
| lobar BMB               | 0.66                                | 0.72    | 0.53            | 0.84            | NA        |  | 23.62 |
| mixed or deep BMB       | 0.42                                | 0.21    | 0.18            | 0.26            | NA        |  | 23.62 |
| all location ICH or SVS | 0.82                                | 0.71    | 0.35            | 0.32            | NA        |  | 23.62 |
| lobar ICH or SVS        | 0.87                                | 0.69    | 0.31            | 0.62            | NA        |  | 23.62 |
| non-lobar ICH or SVS    | 0.33                                | 0.32    | 0.38            | 0.33            | NA        |  | 23.62 |

Supplement 4 Table 5. Results of sensitivity analysis of Intrinsic HorvathAge acceleration on CSVD

| Intrinsic<br>HorvathAge<br>acceleration<br>on CSVD | Heterogeneity test<br>(Cochran's Q) |         | Pleiotropy test |                 | MR PRESSO |  | F |
|----------------------------------------------------|-------------------------------------|---------|-----------------|-----------------|-----------|--|---|
|                                                    | P (MR Egger)                        | P (IVW) | P (MR Egger)    | P (Global test) | Outlier   |  |   |

|                |       |       |      |       |    |       |
|----------------|-------|-------|------|-------|----|-------|
| WMH            |       |       |      |       |    |       |
| volume         | 0.24  | 0.18  | 0.15 | 0.23  | NA | 18.84 |
| FA             | 0.05  | 0.07  | 0.82 | 0.11  | NA | 18.84 |
| MD             | 0.06  | 0.08  | 0.89 | 0.08  | NA | 18.84 |
| lacunar stroke | 0.004 | 0.005 | 0.60 | 0.003 | NA | 20.00 |
| all location   |       |       |      |       |    |       |
| BMB            | 0.65  | 0.70  | 0.69 | 0.80  | NA | 19.61 |
| lobar BMB      | 0.89  | 0.92  | 0.67 | 0.74  | NA | 19.61 |
| mixed or       |       |       |      |       |    |       |
| deep BMB       | 0.67  | 0.70  | 0.56 | 0.75  | NA | 19.61 |
| all location   |       |       |      |       |    |       |
| ICH or SVS     | 0.18  | 0.16  | 0.25 | 0.21  | NA | 18.39 |
| lobar ICH or   |       |       |      |       |    |       |
| SVS            | 0.05  | 0.06  | 0.44 | 0.09  | NA | 18.39 |
| non-lobar      |       |       |      |       |    |       |
| ICH or SVS     | 0.40  | 0.28  | 0.09 | 0.29  | NA | 18.39 |
